# Supplementary material for: Single-cell RNA sequencing reveals melanoma cell state-dependent heterogeneity of response to MAPK inhibitors
Source: PubMed Central journal article supplement — eBioMedicine. 2024 Aug 30;107:105308. doi: 10.1016/j.ebiom.2024.105308 (PMC11402938; doi:10.1016/j.ebiom.2024.105308), 2024-08-30

# Supplementary Figure 1

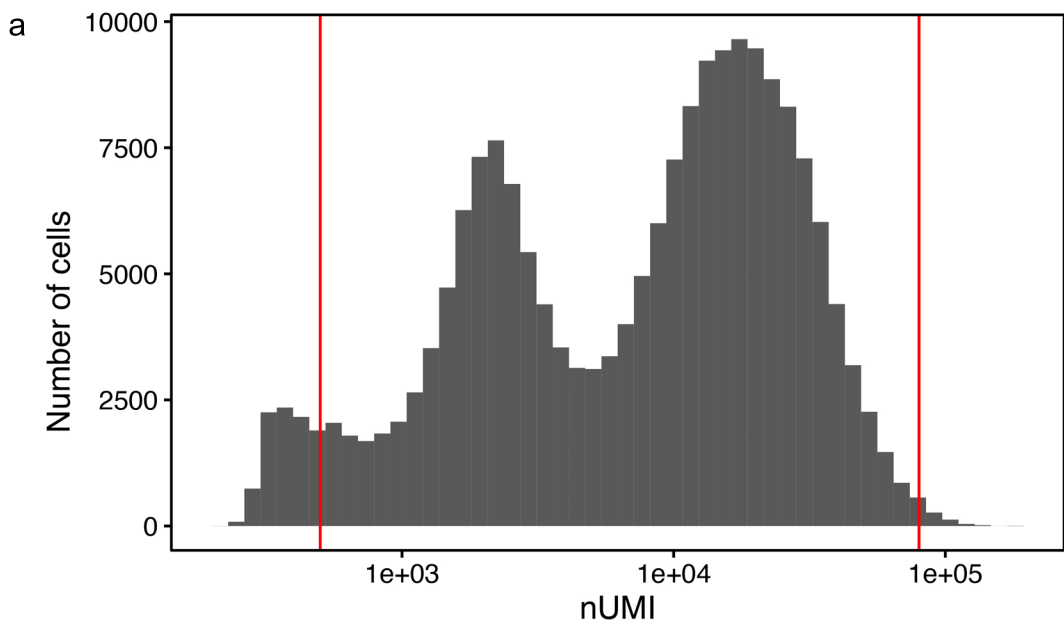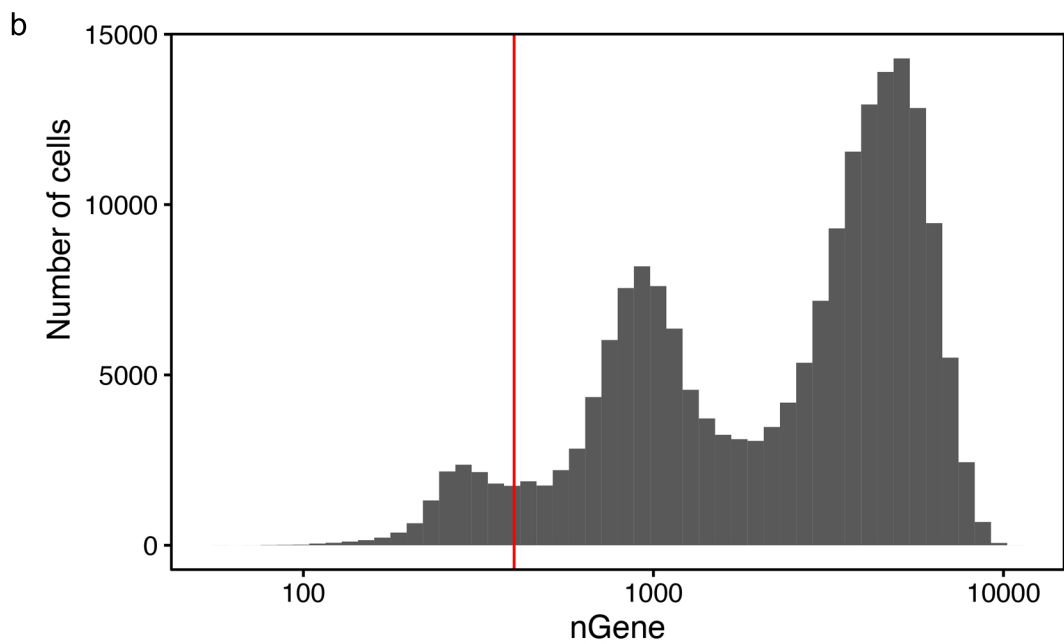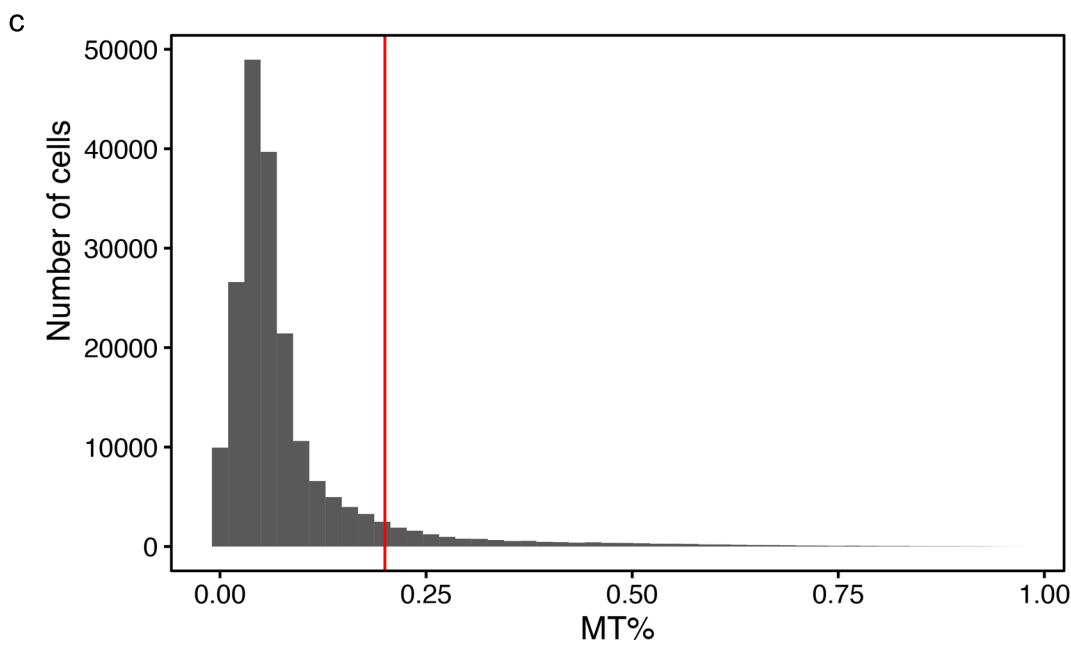

Supplementary Figure 2

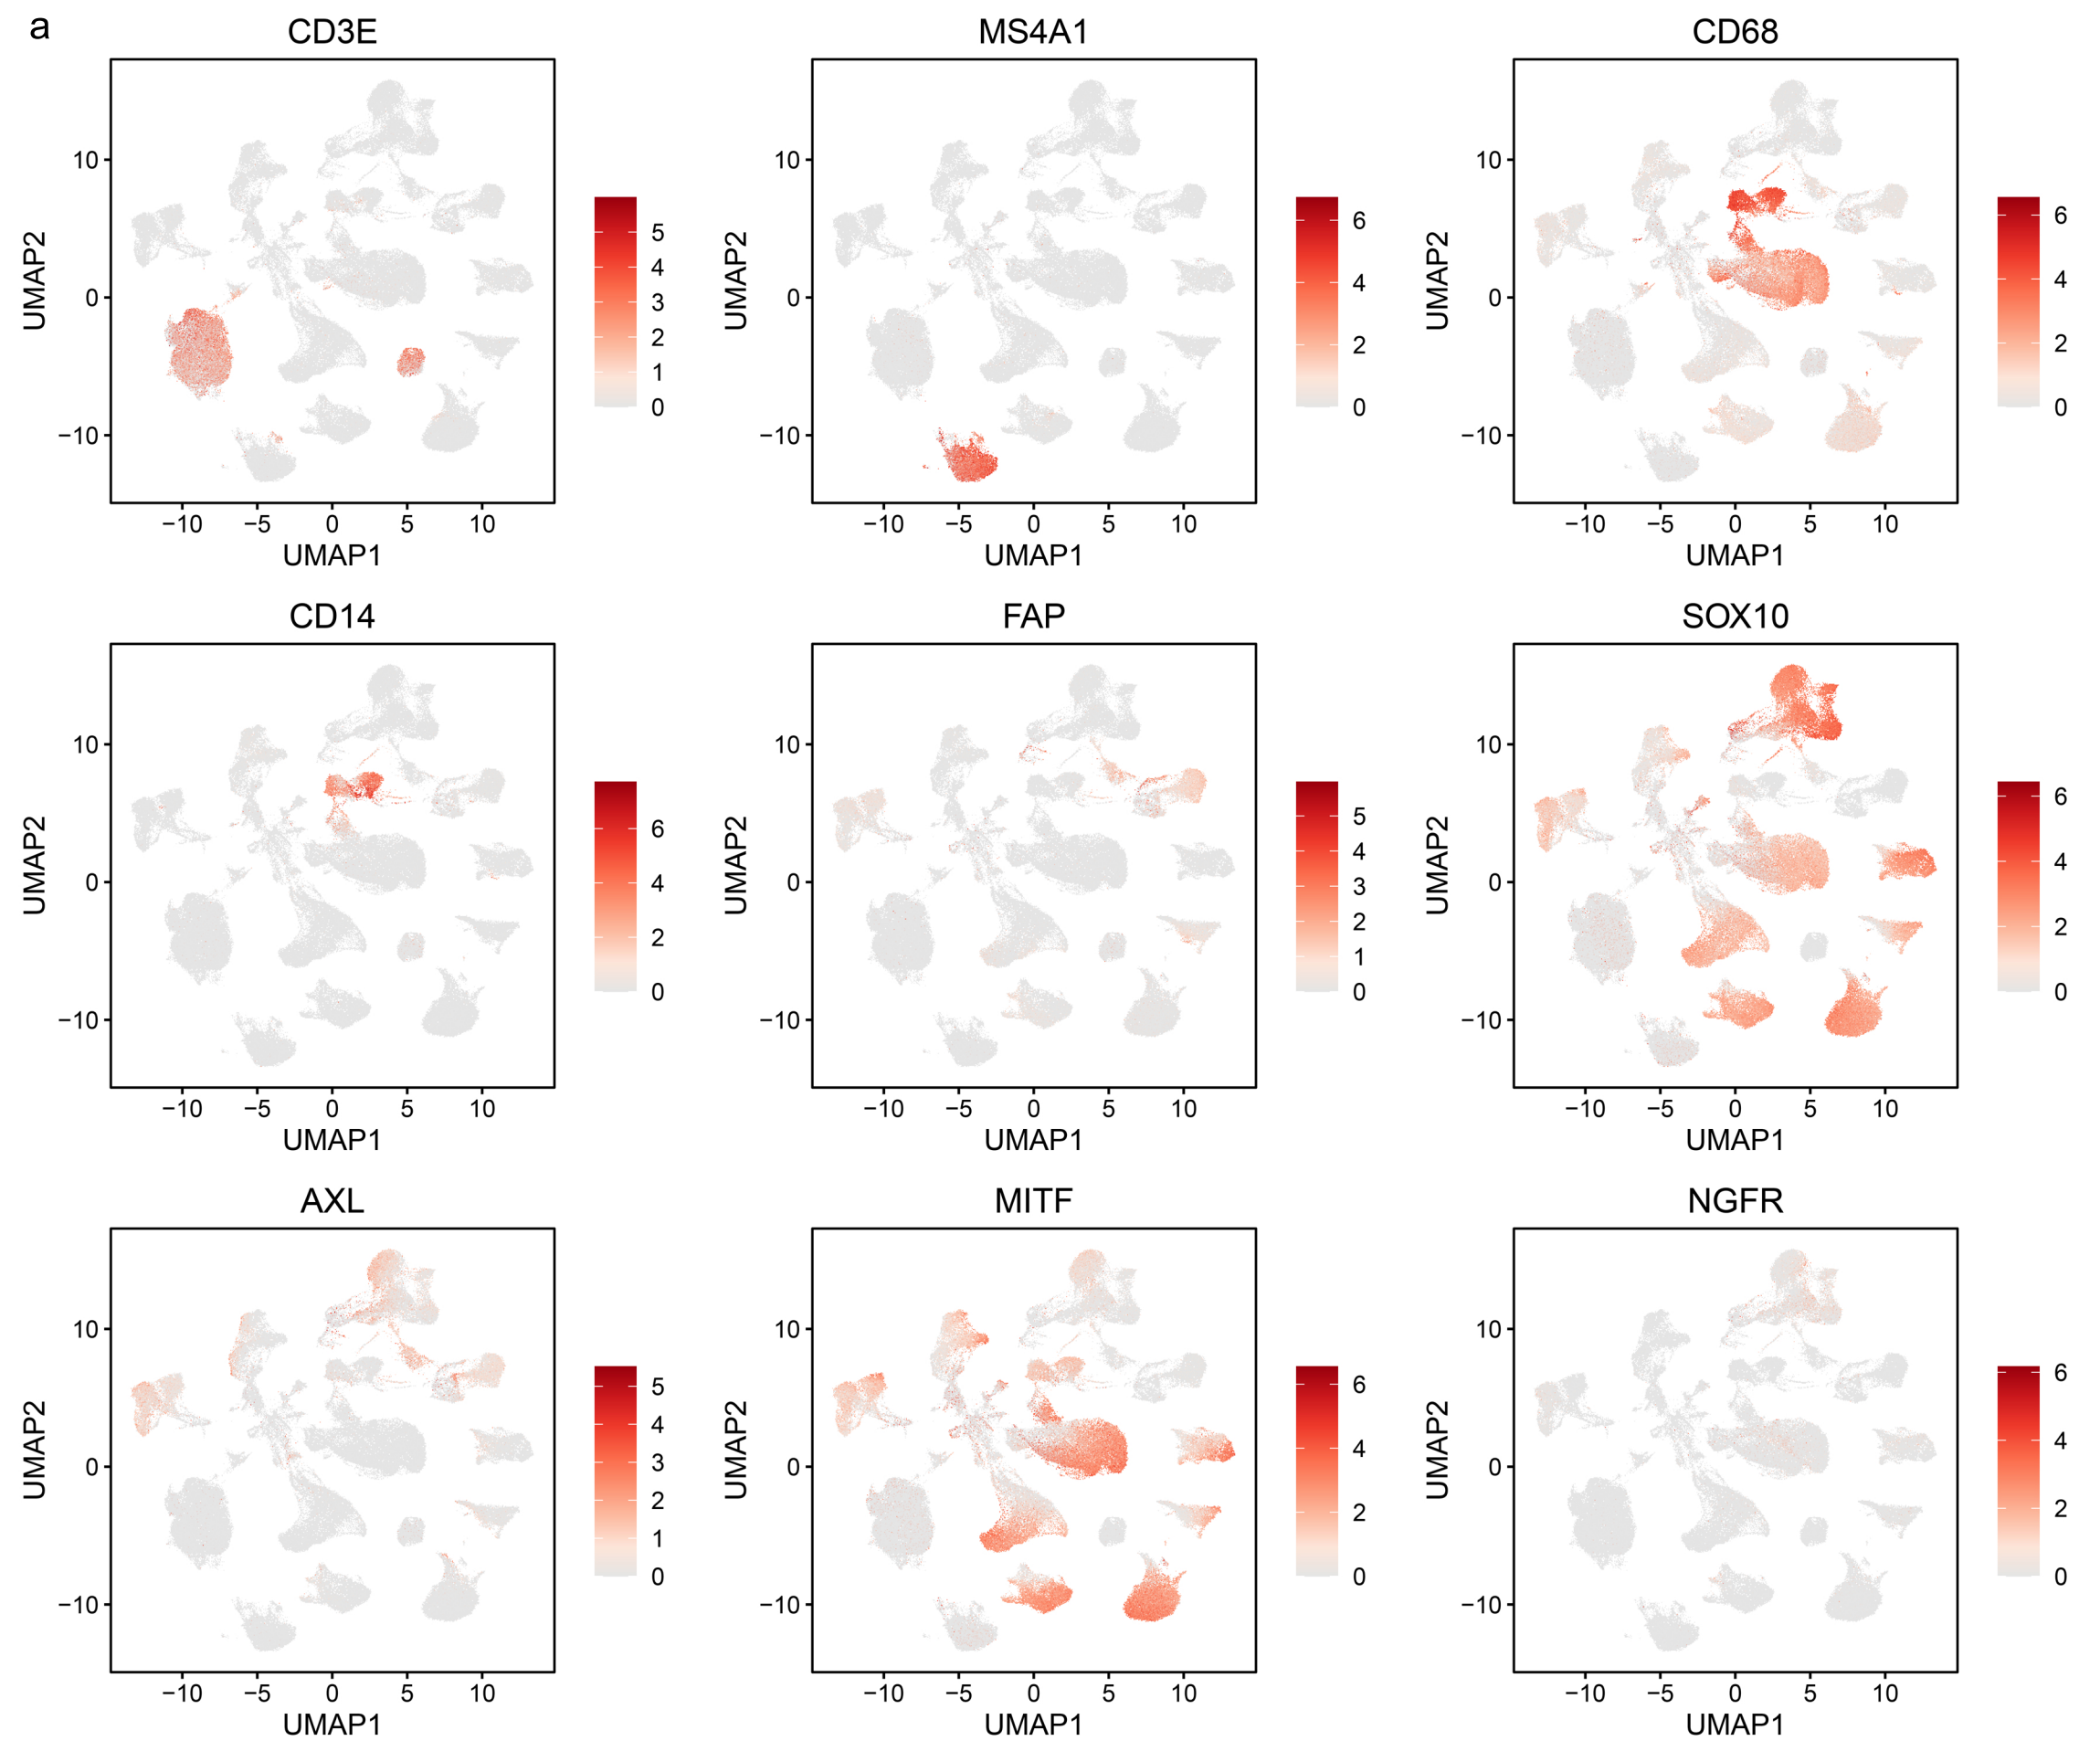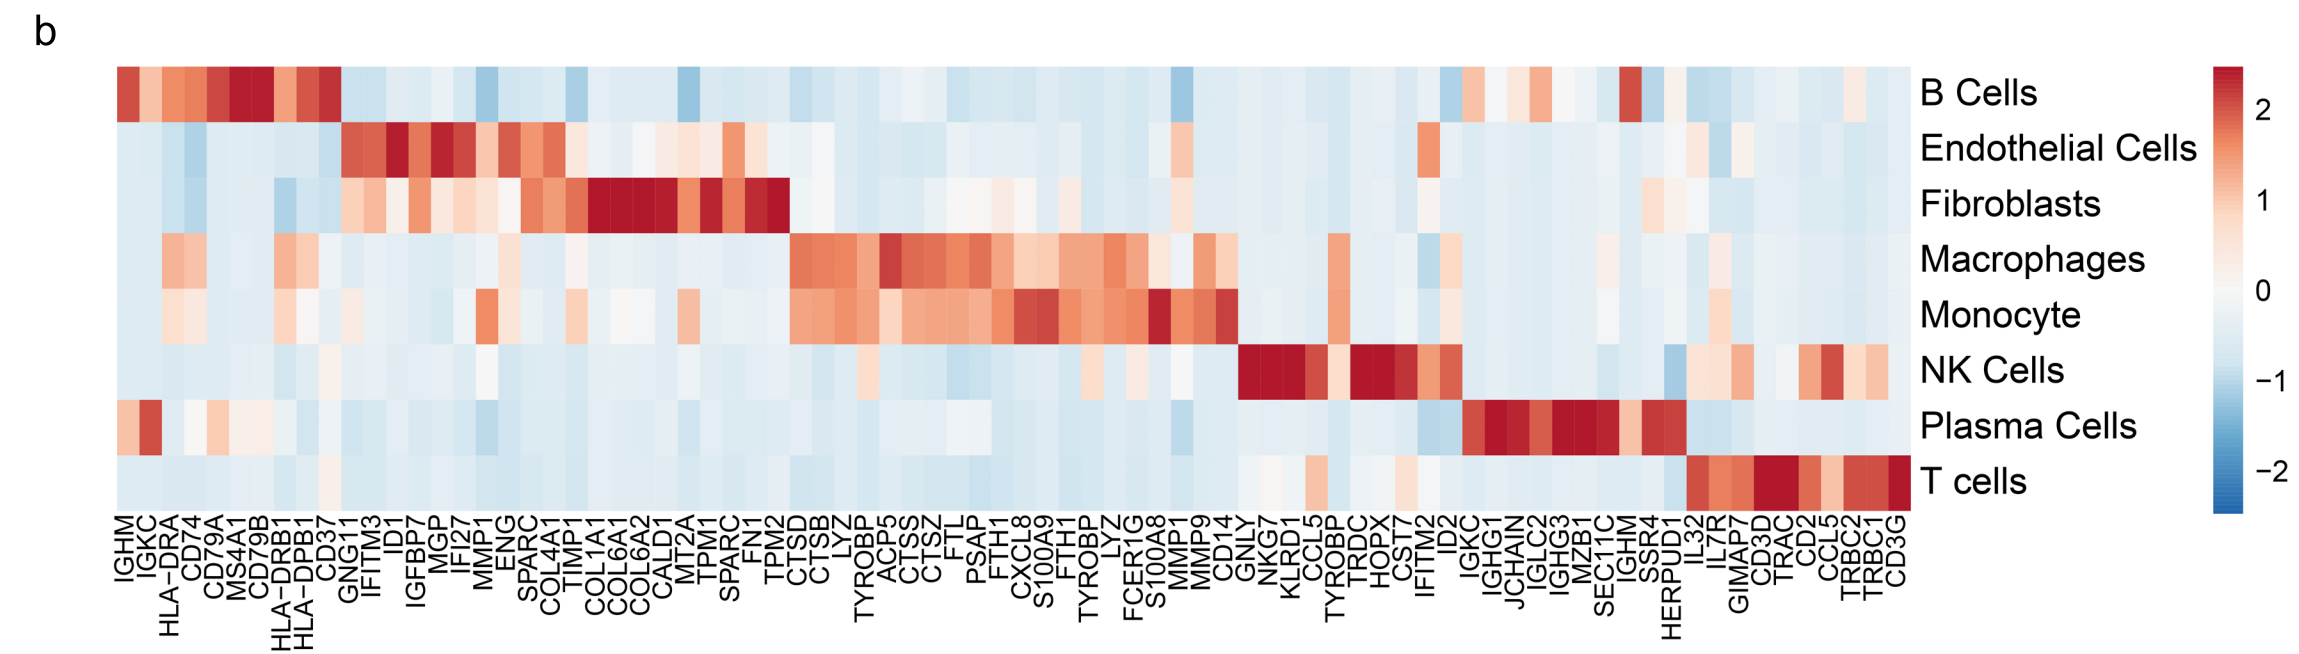

# Supplementary Figure 3

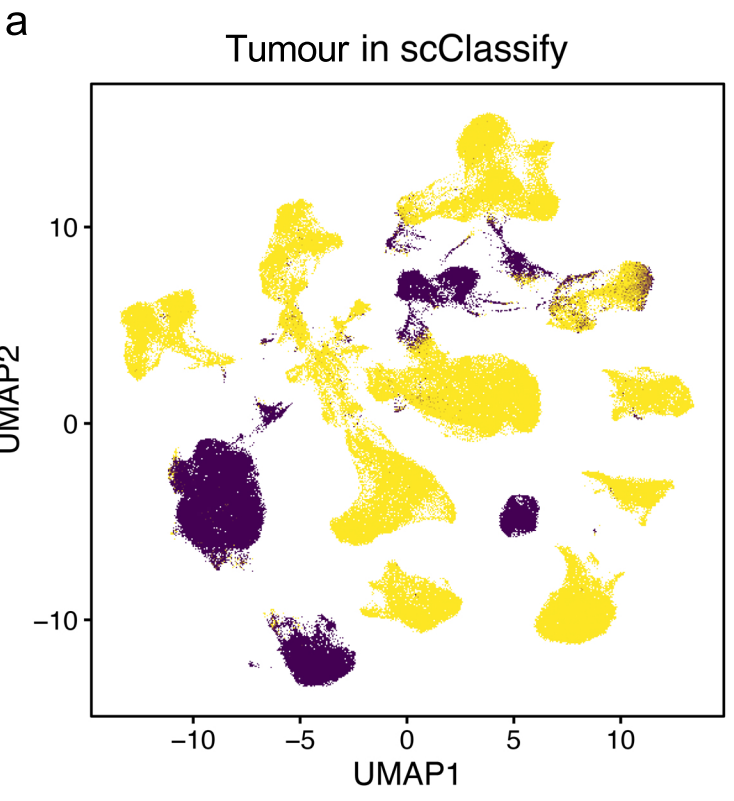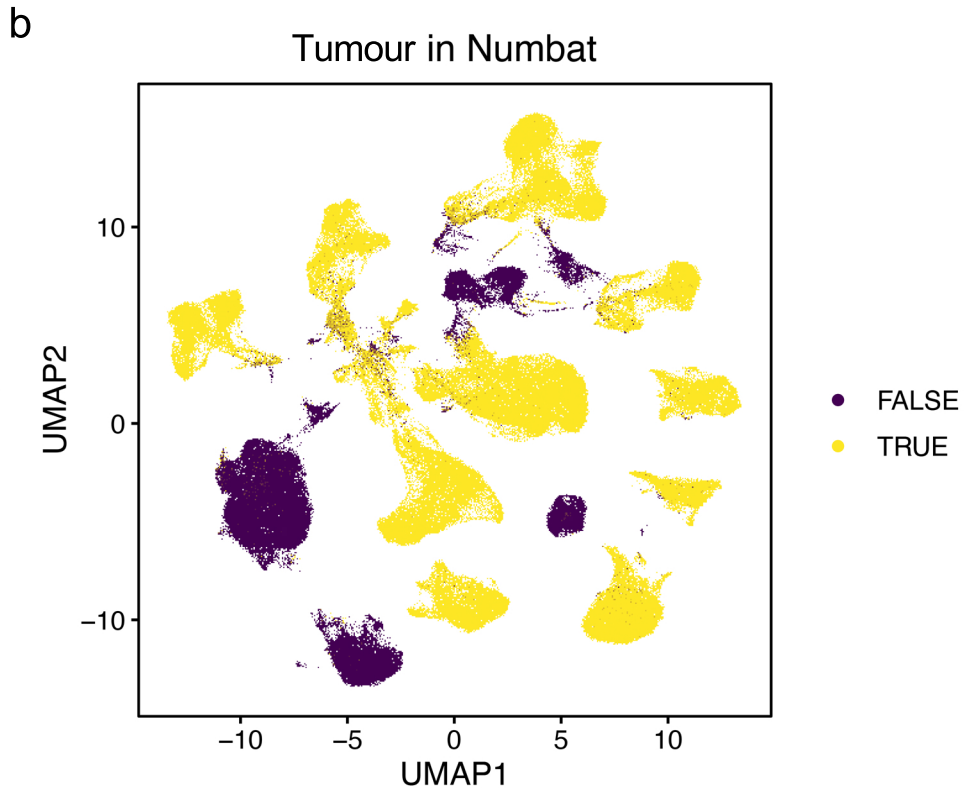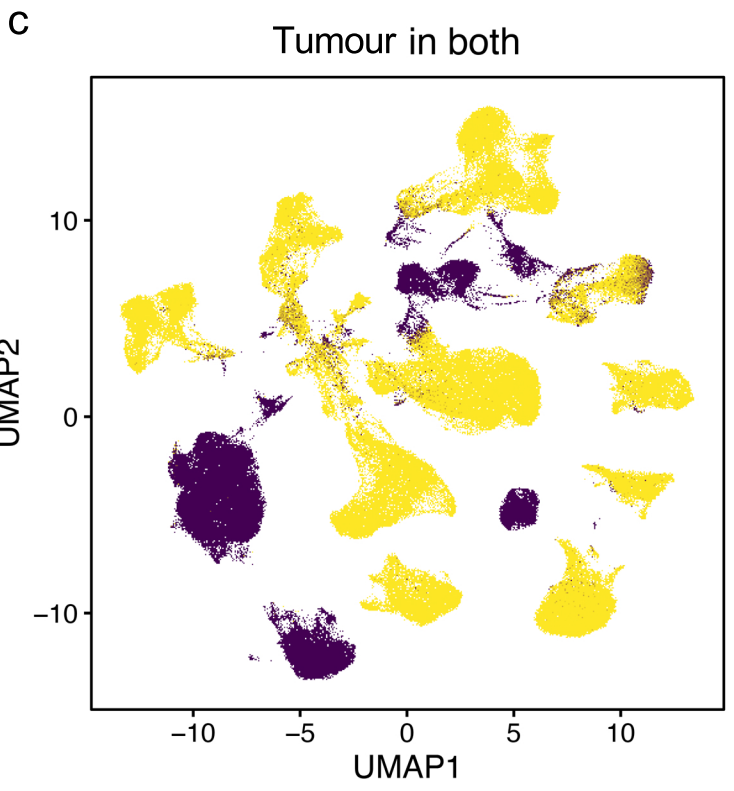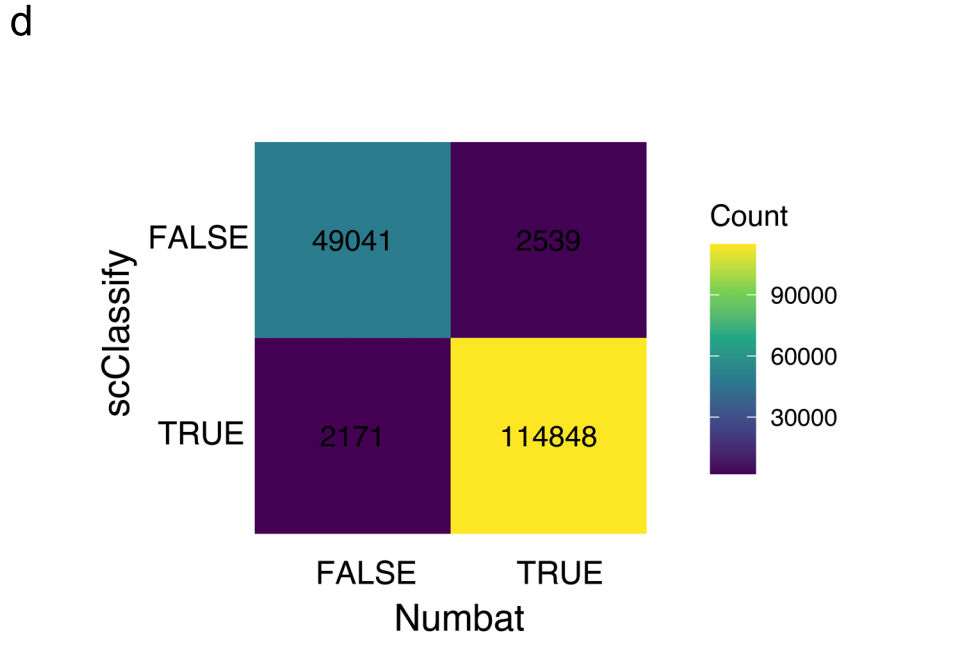

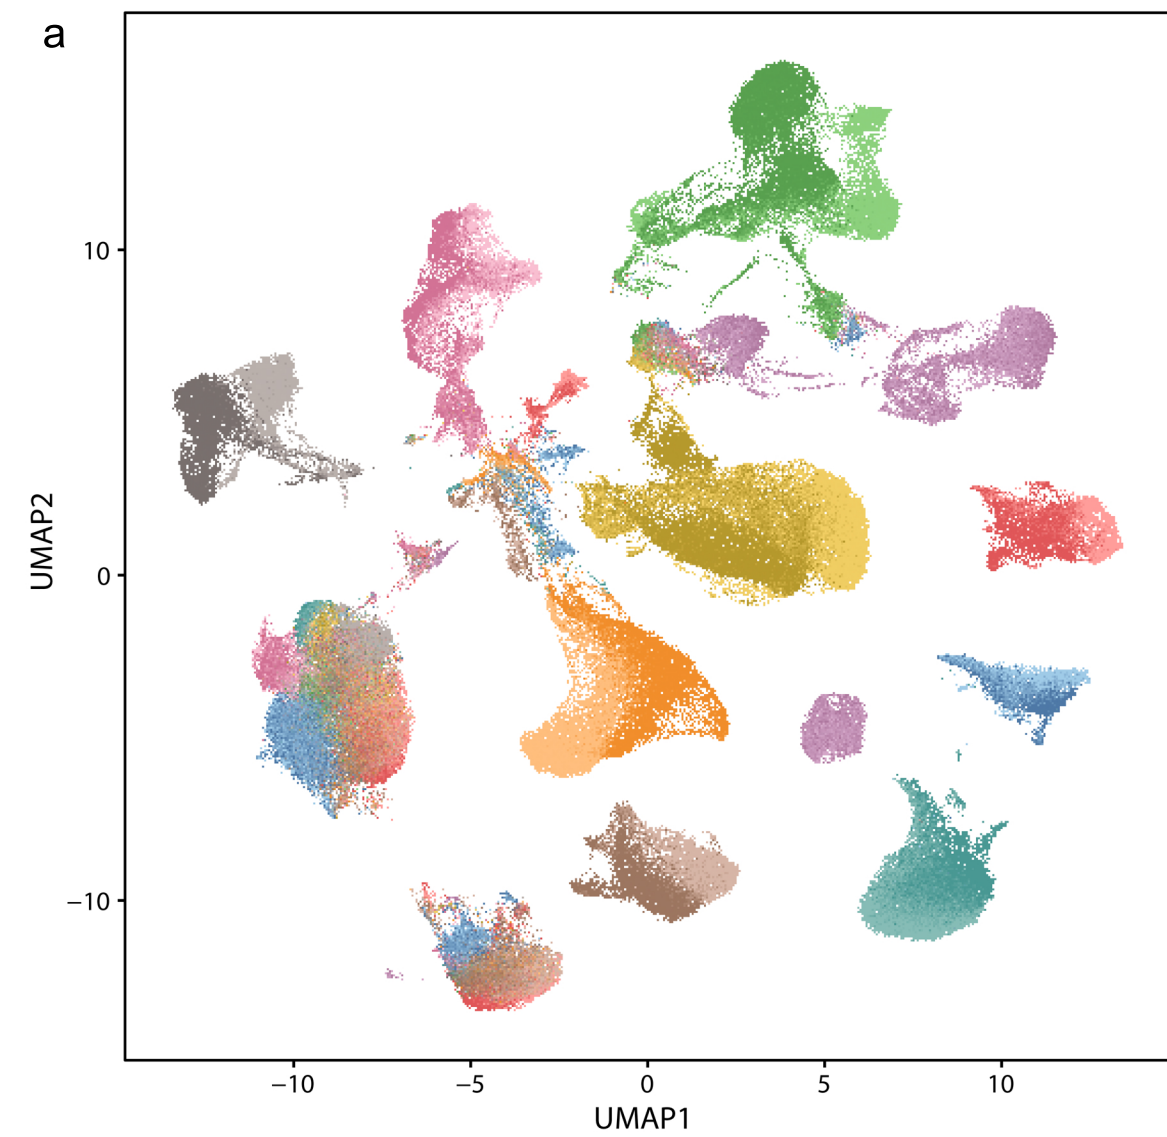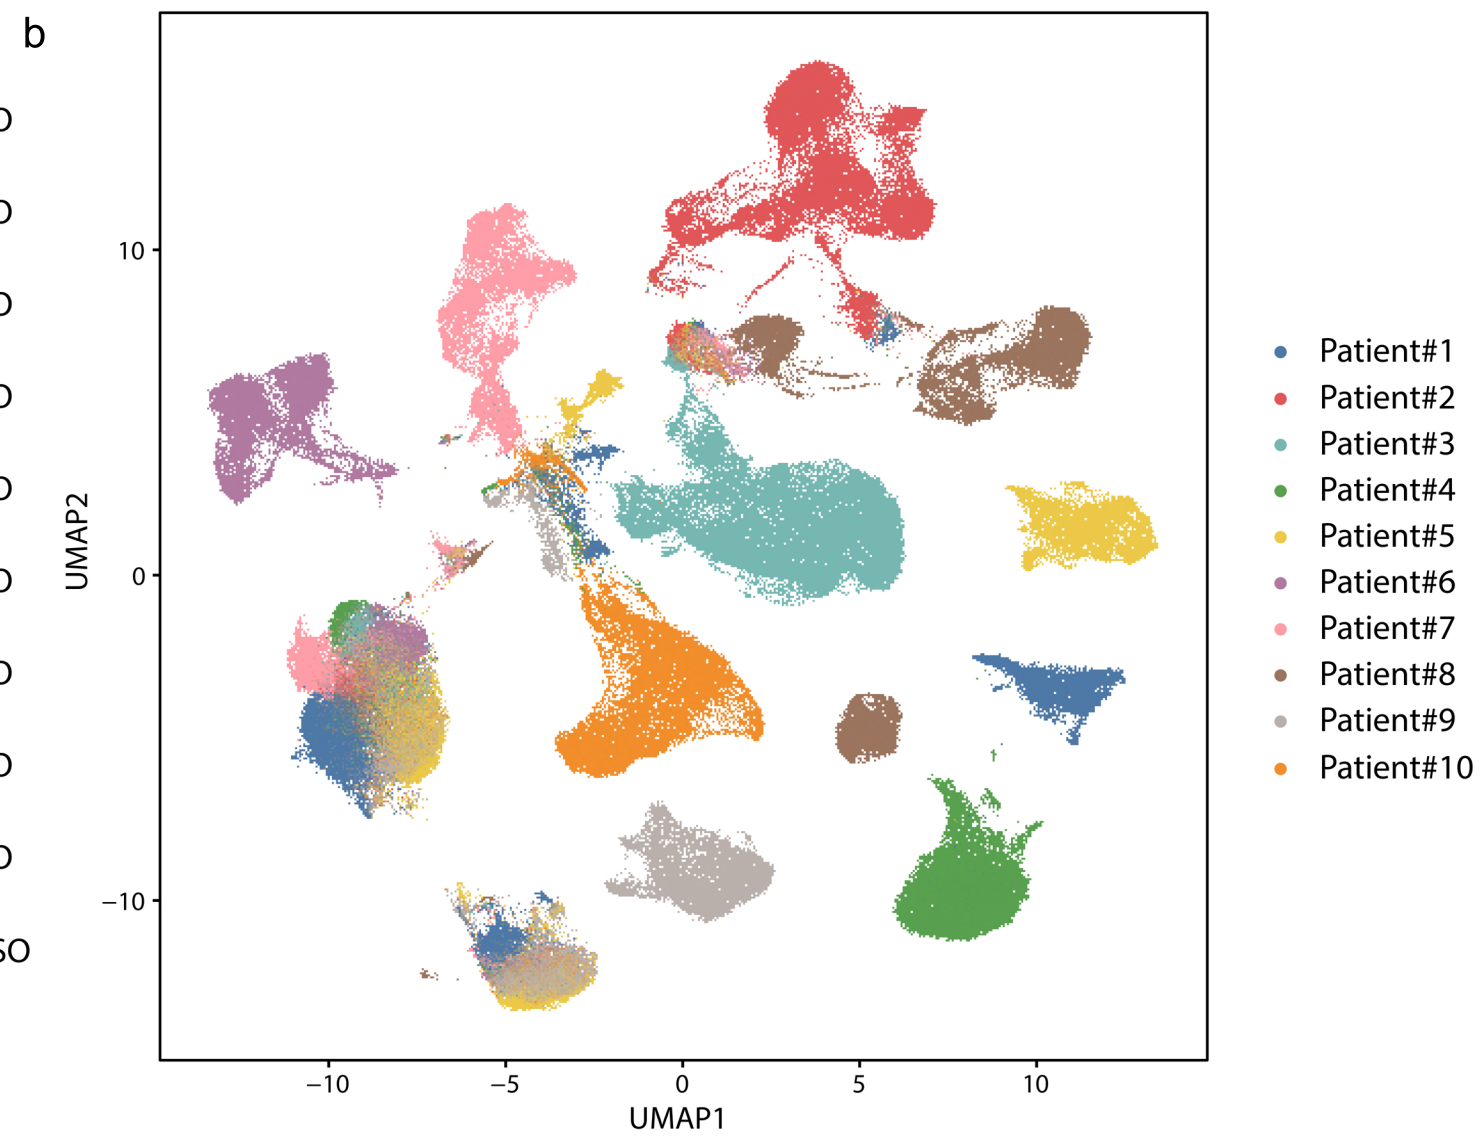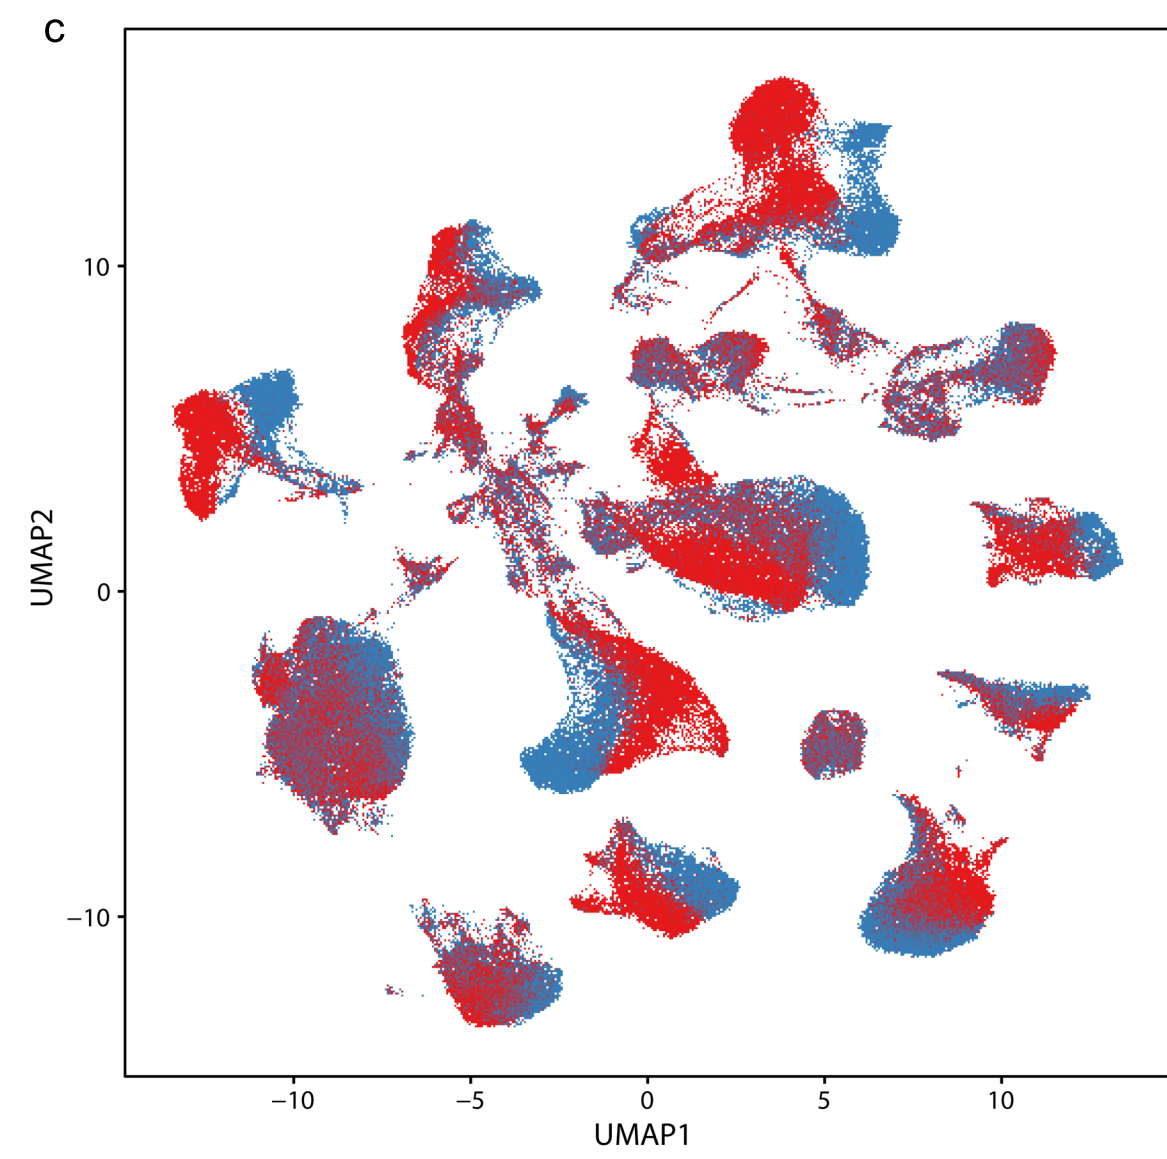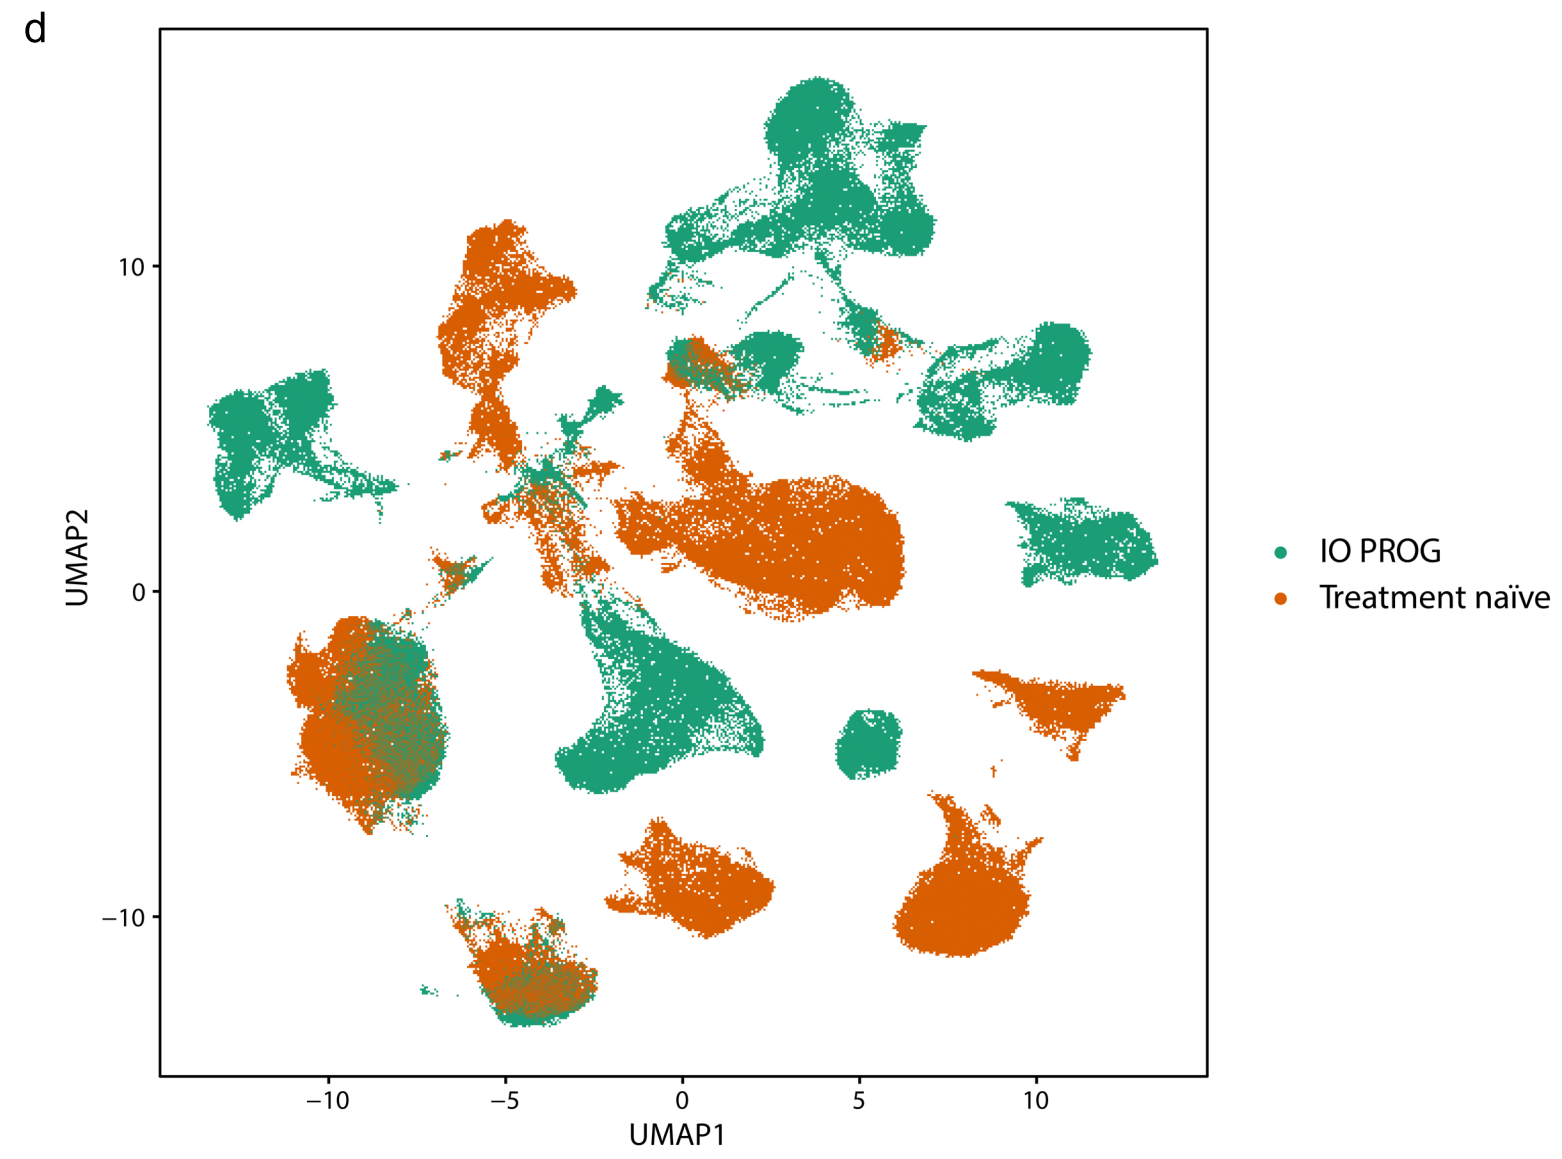

# Supplementary Figure 5

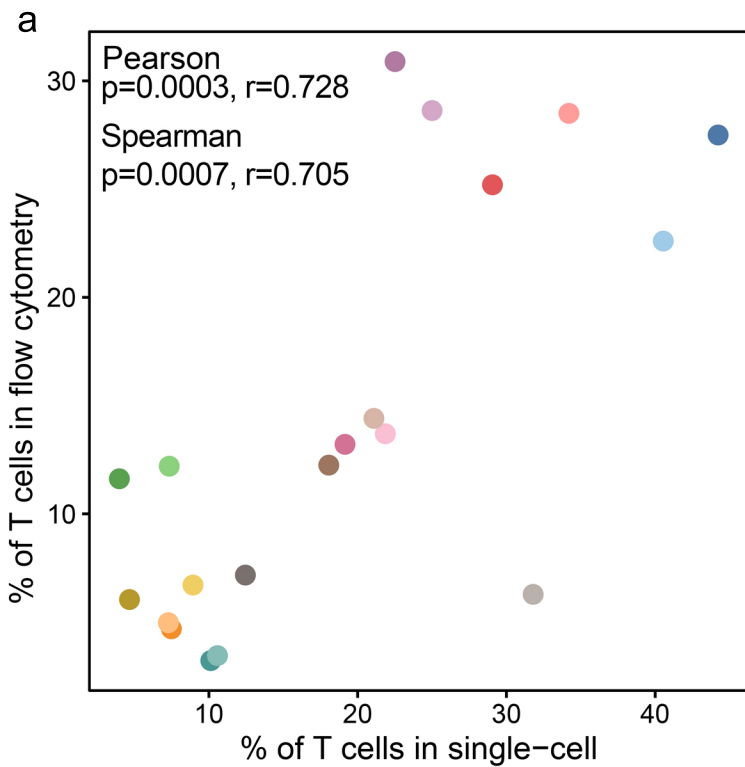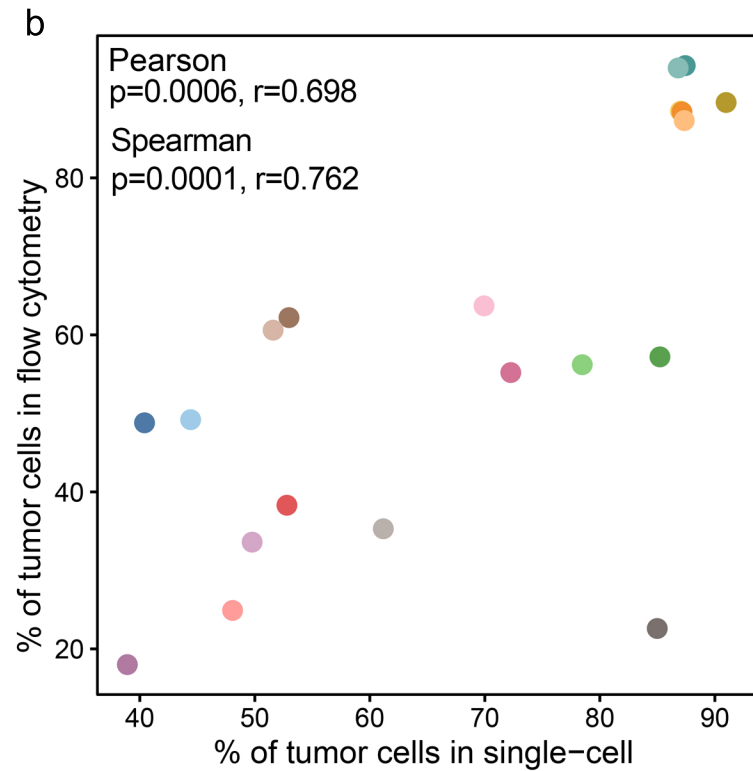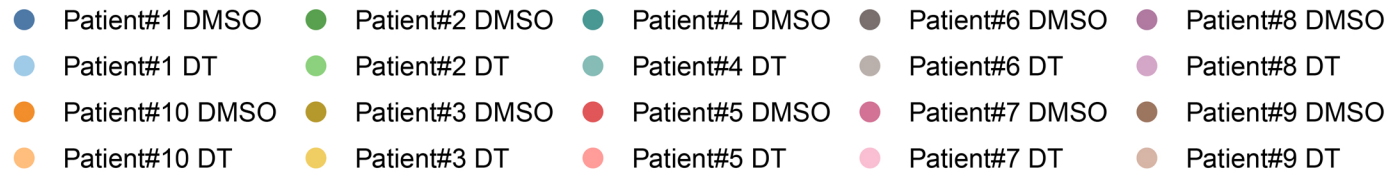

Supplementary Figure 6

a

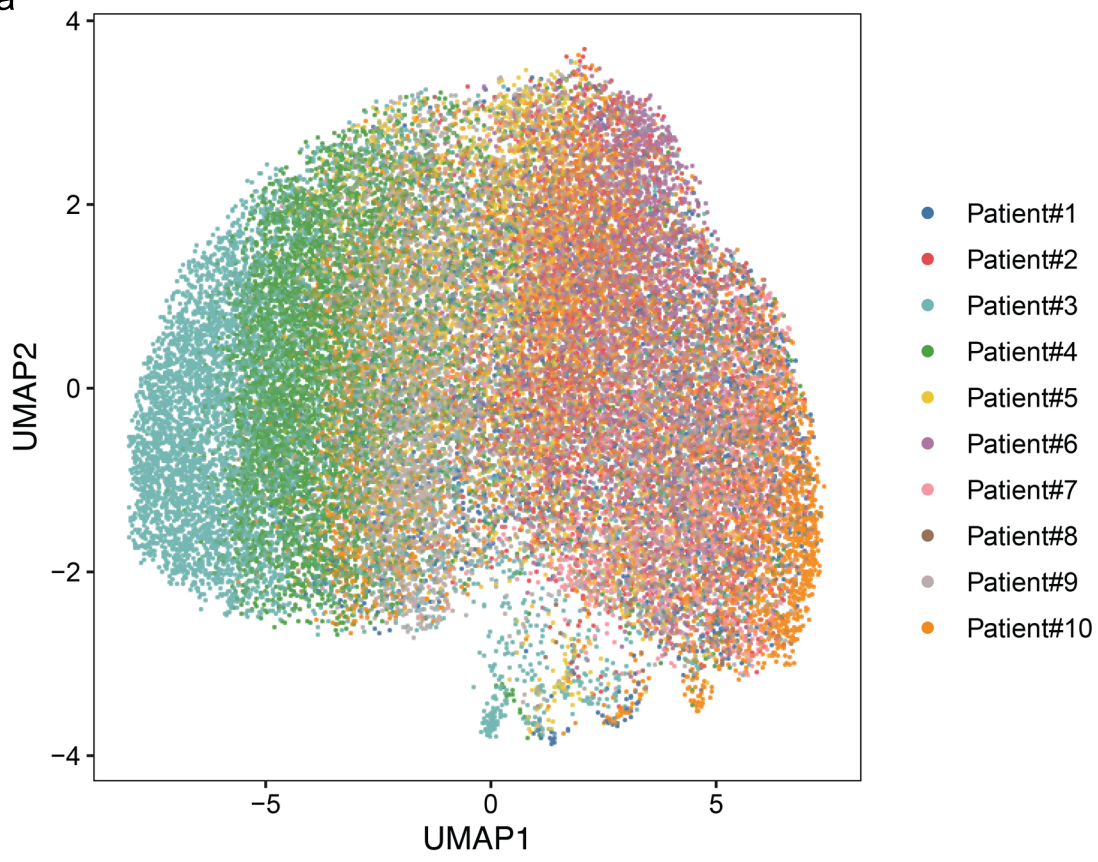

b

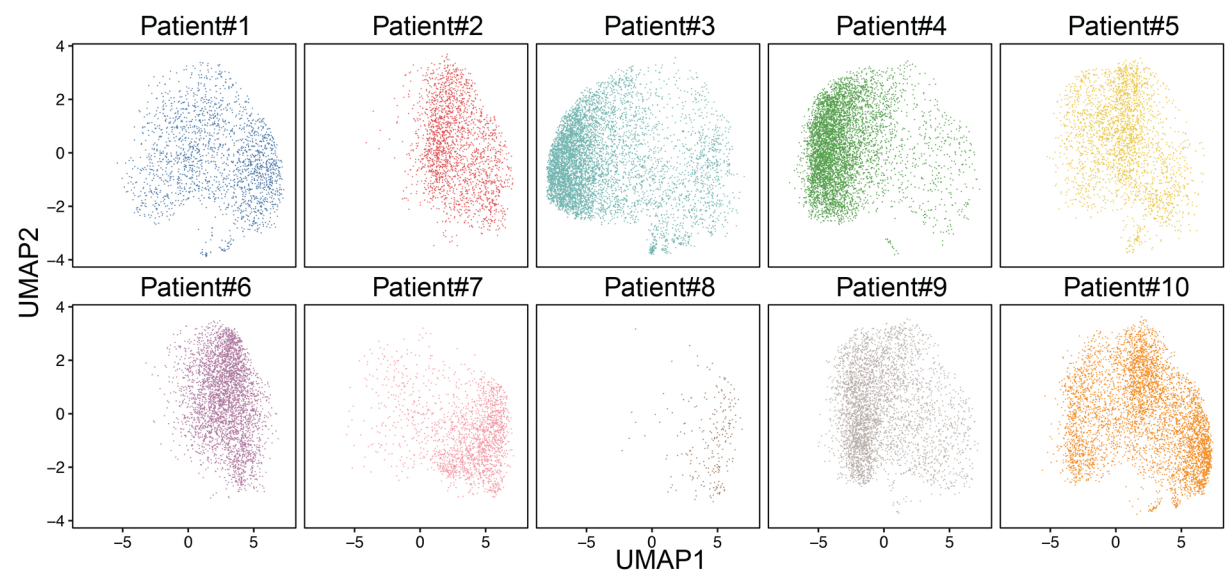

Supplementary Figure 7

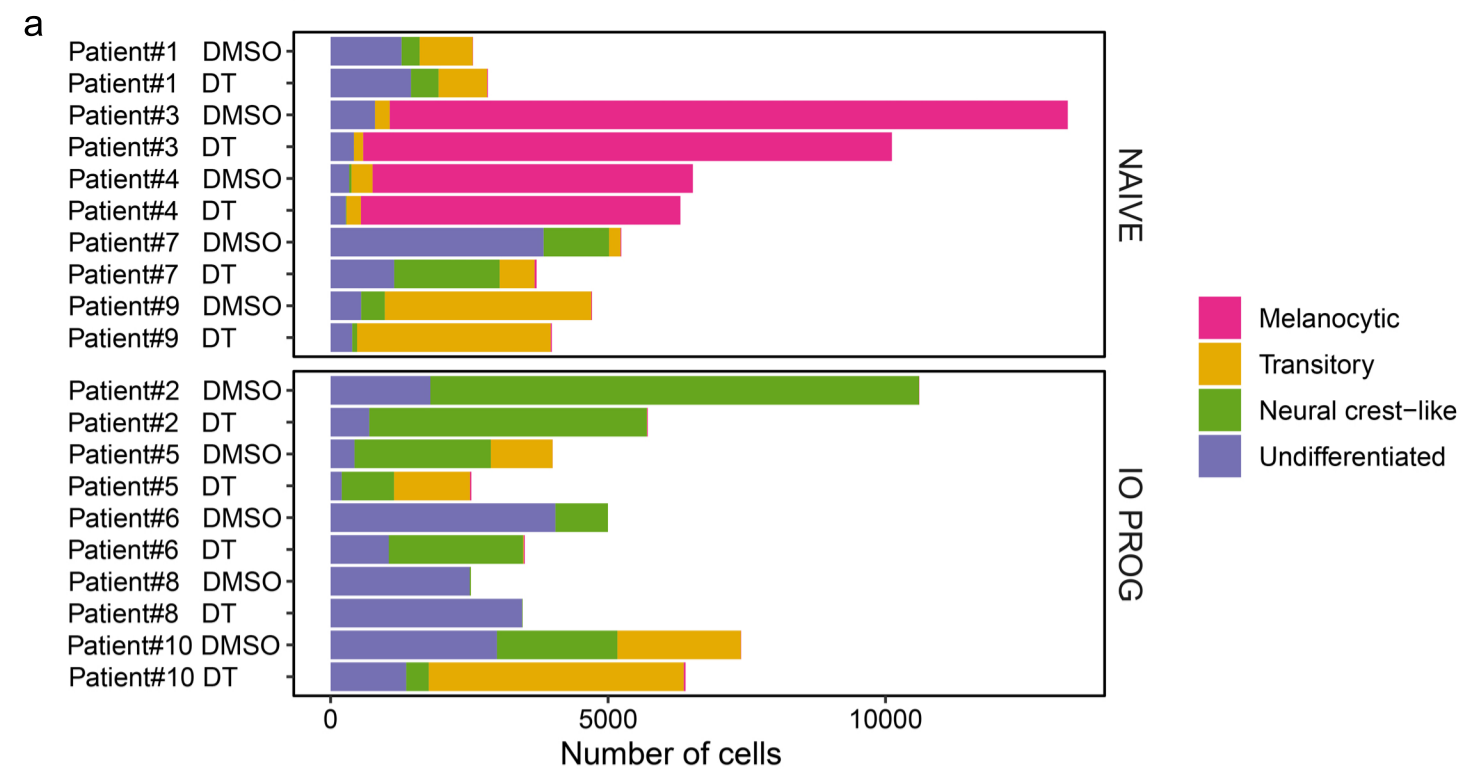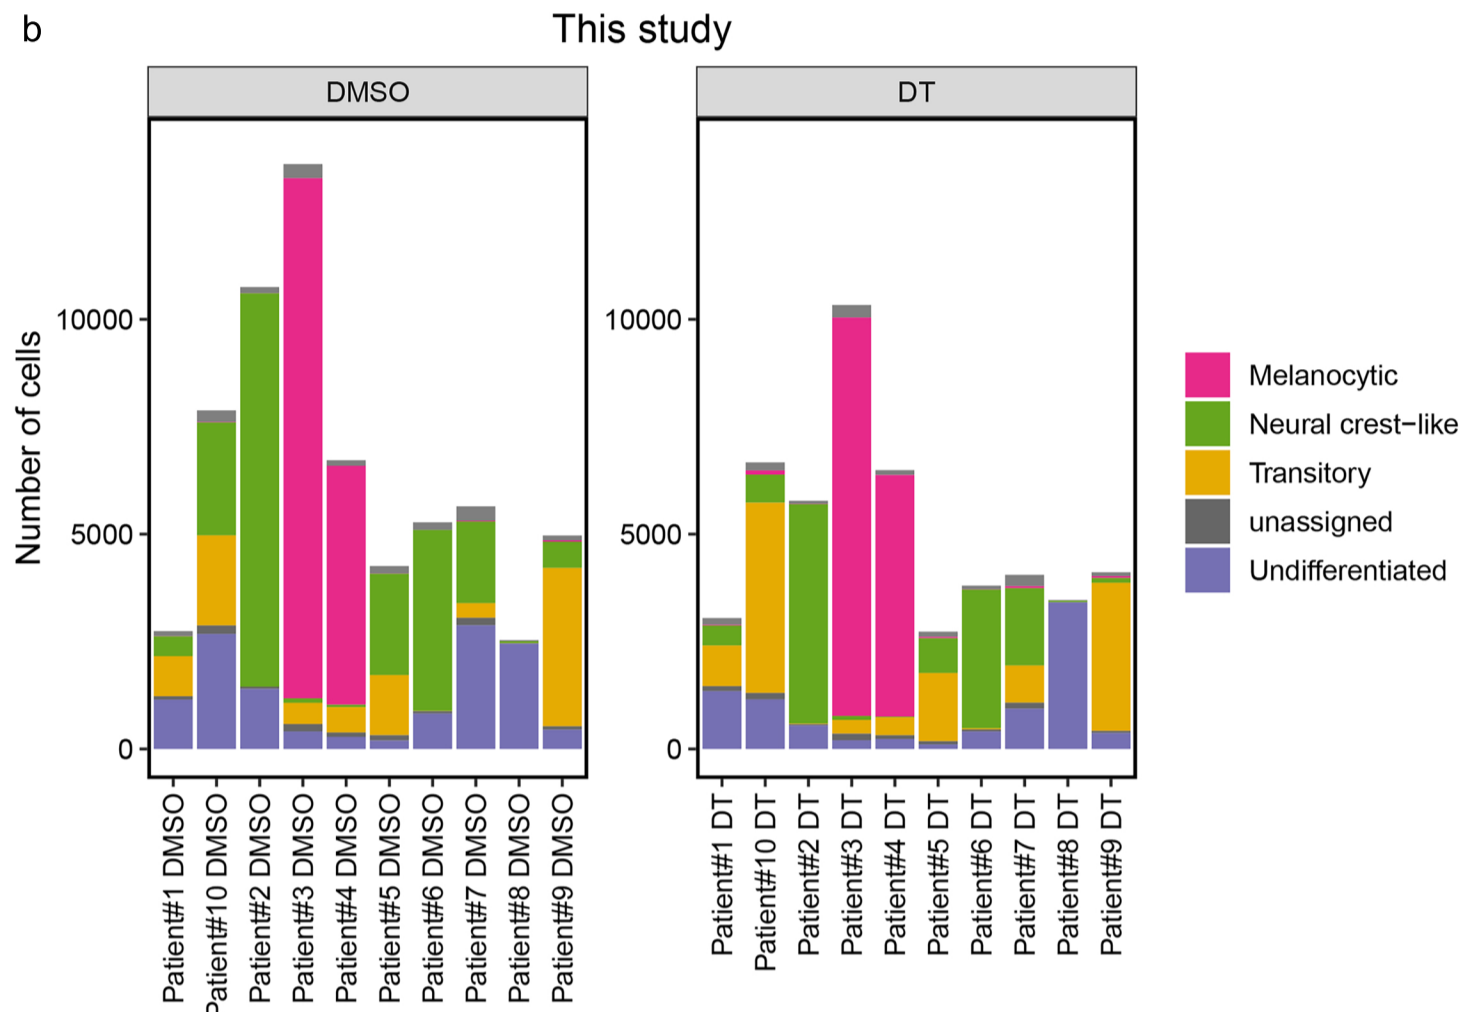

Pozniak et al.

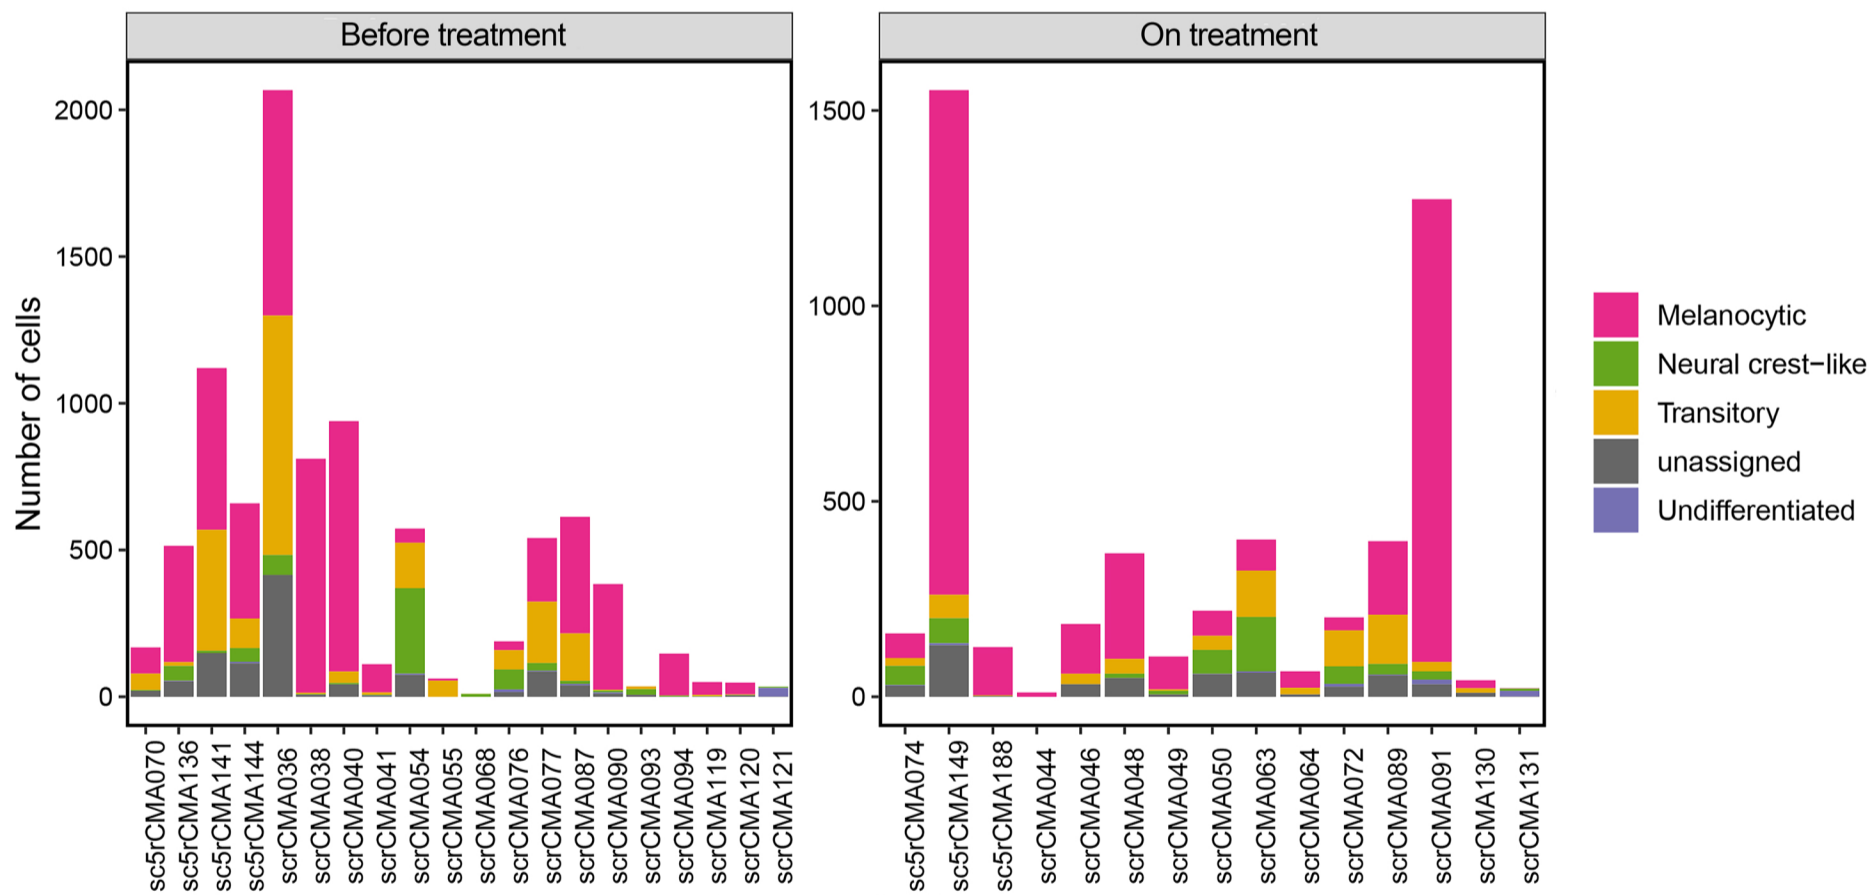

Jerby-Arnon et al.

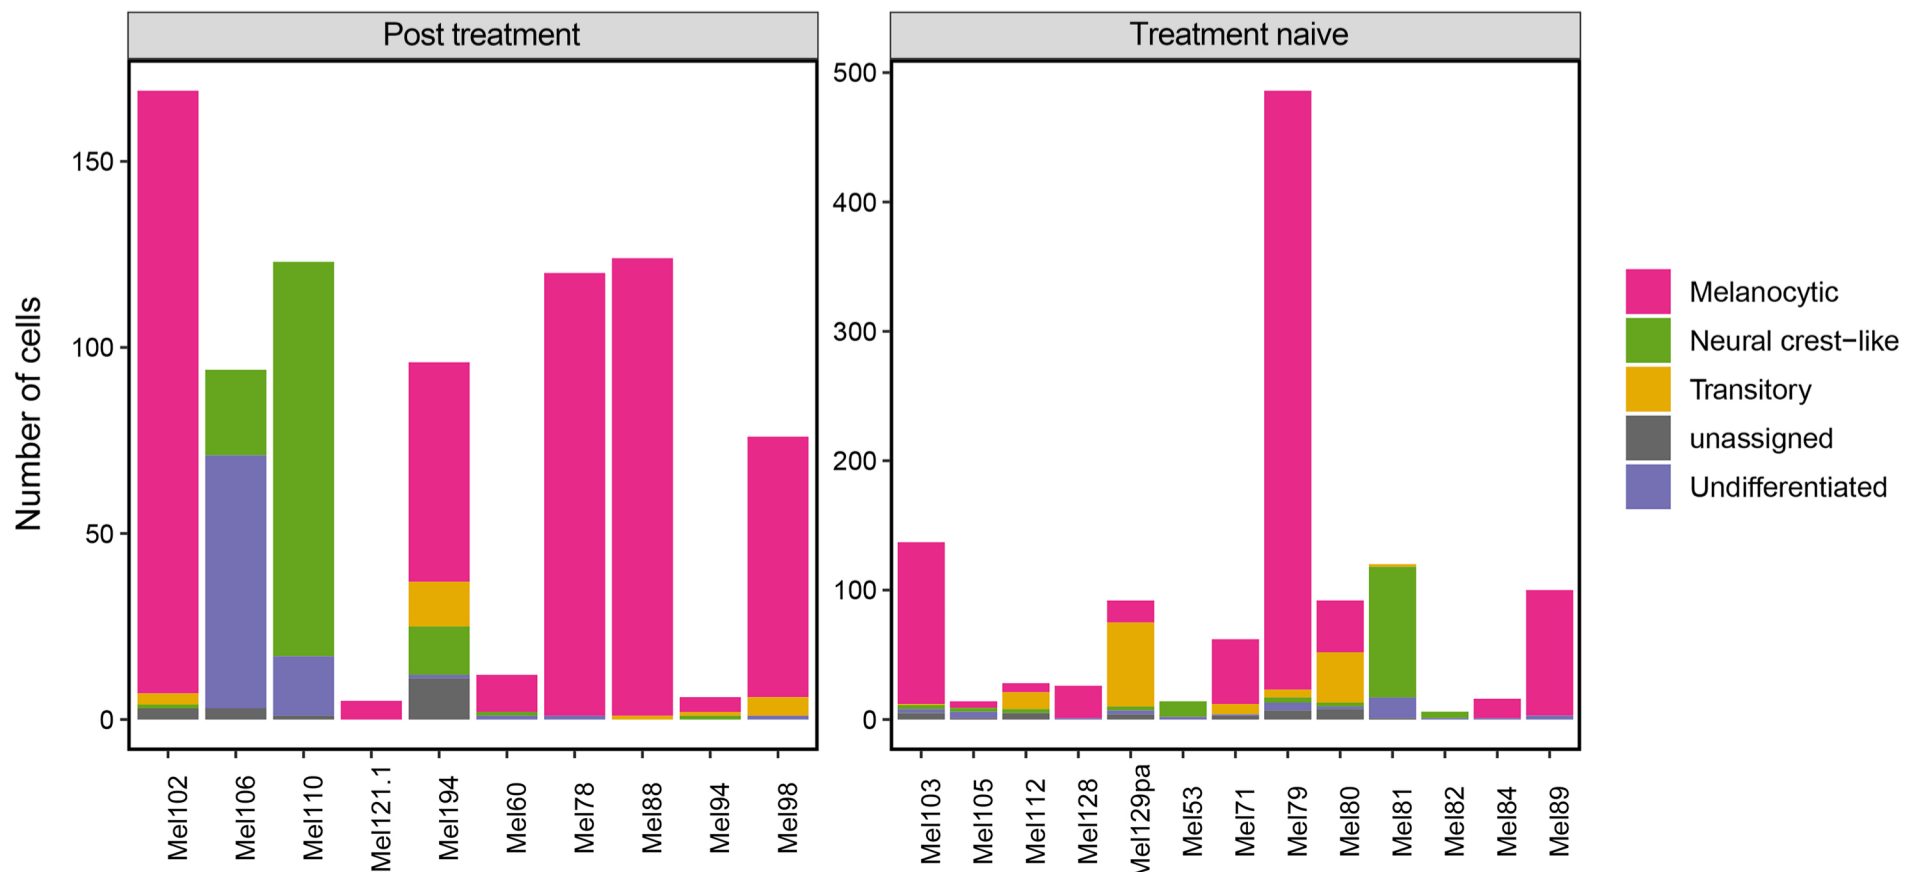

SOX10

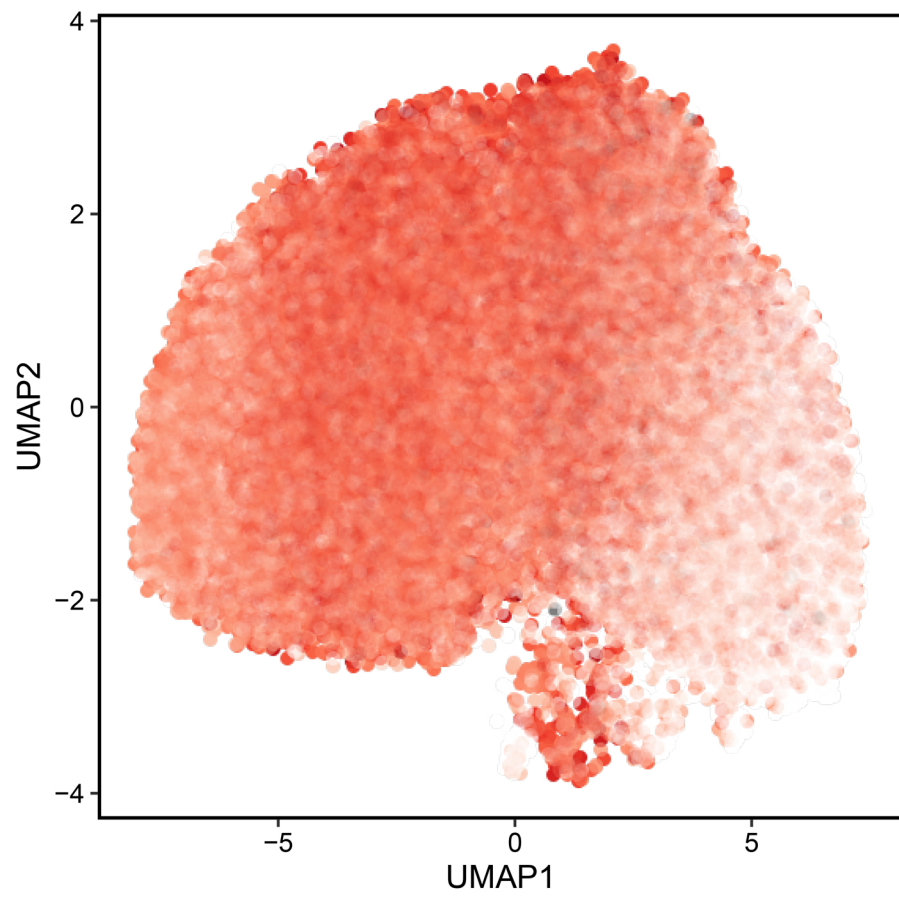

AXL

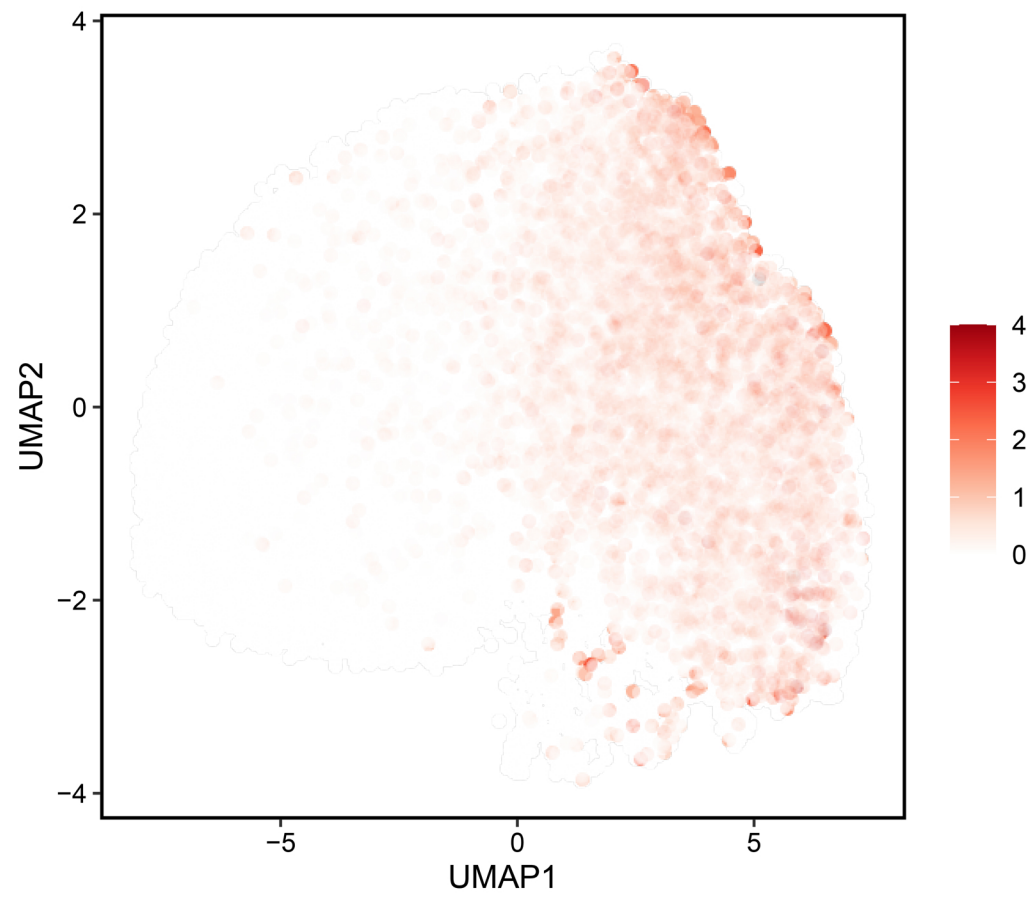

MITF

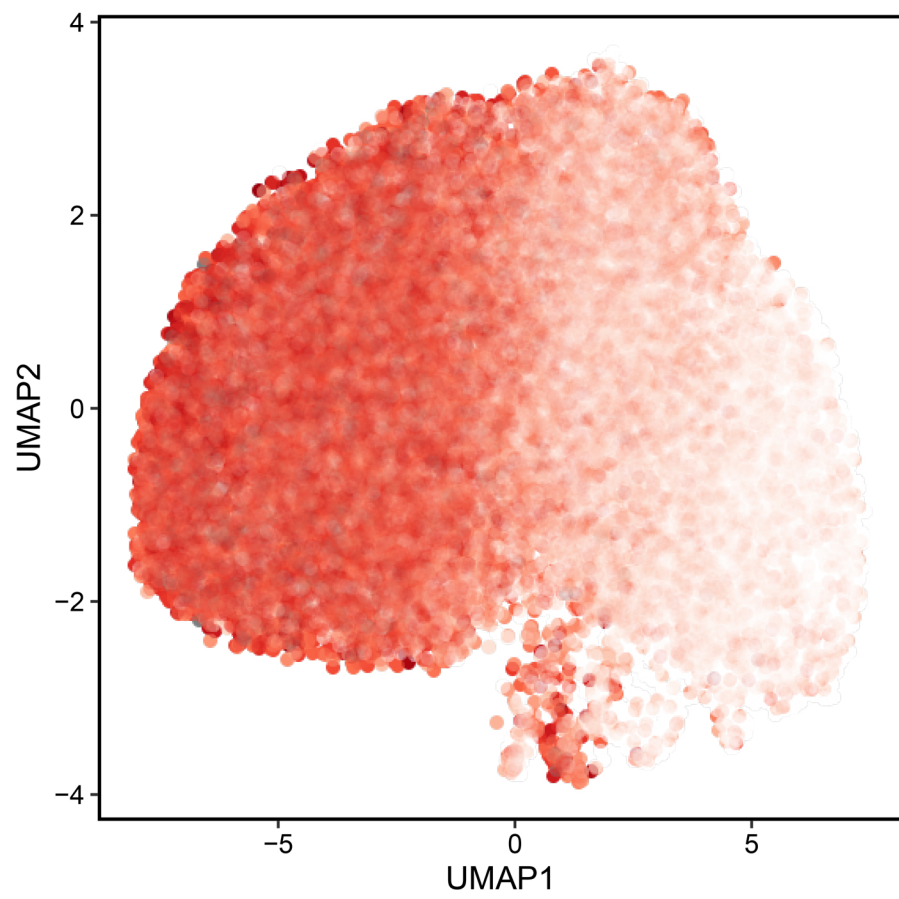

NGFR

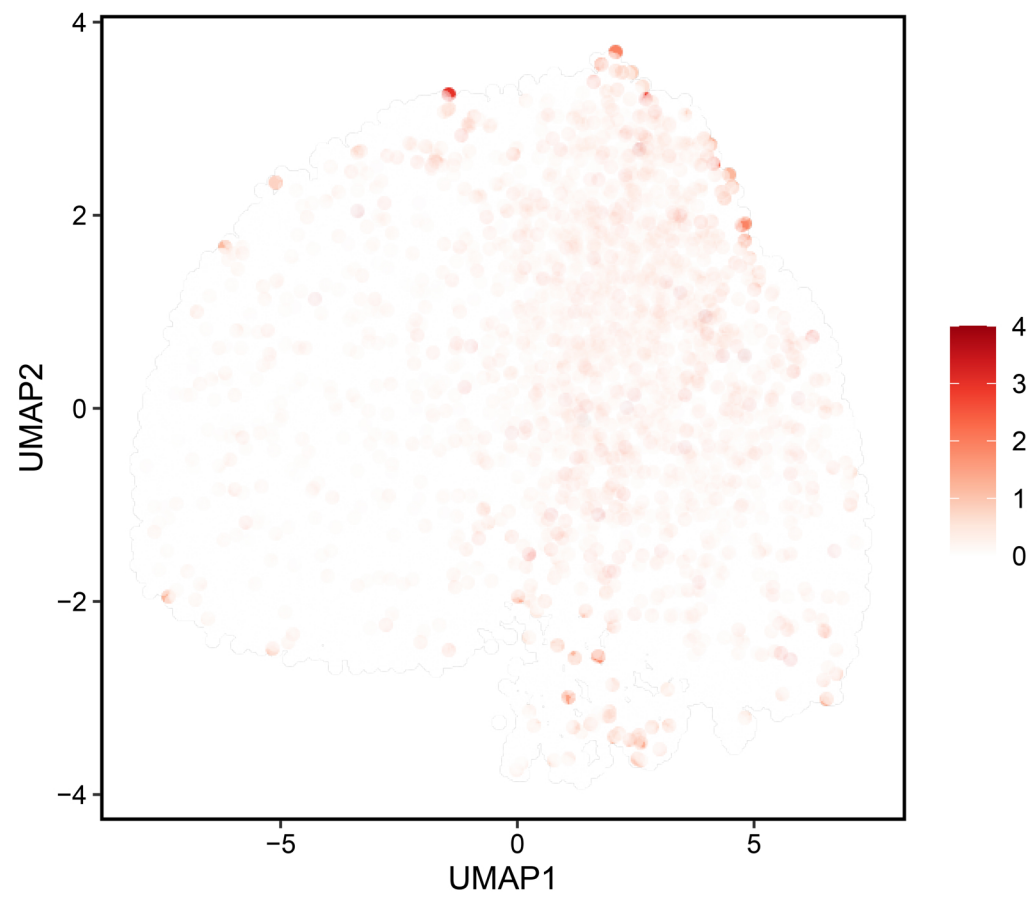



# Supplementary Figure 9

**a**

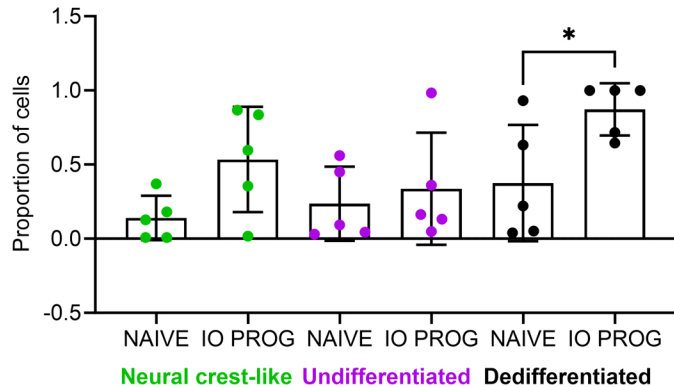

**b**

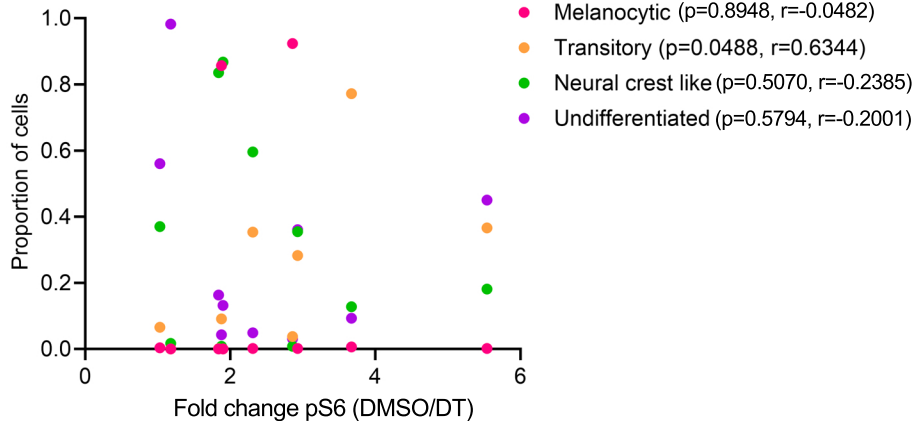

# Supplementary Figure 10

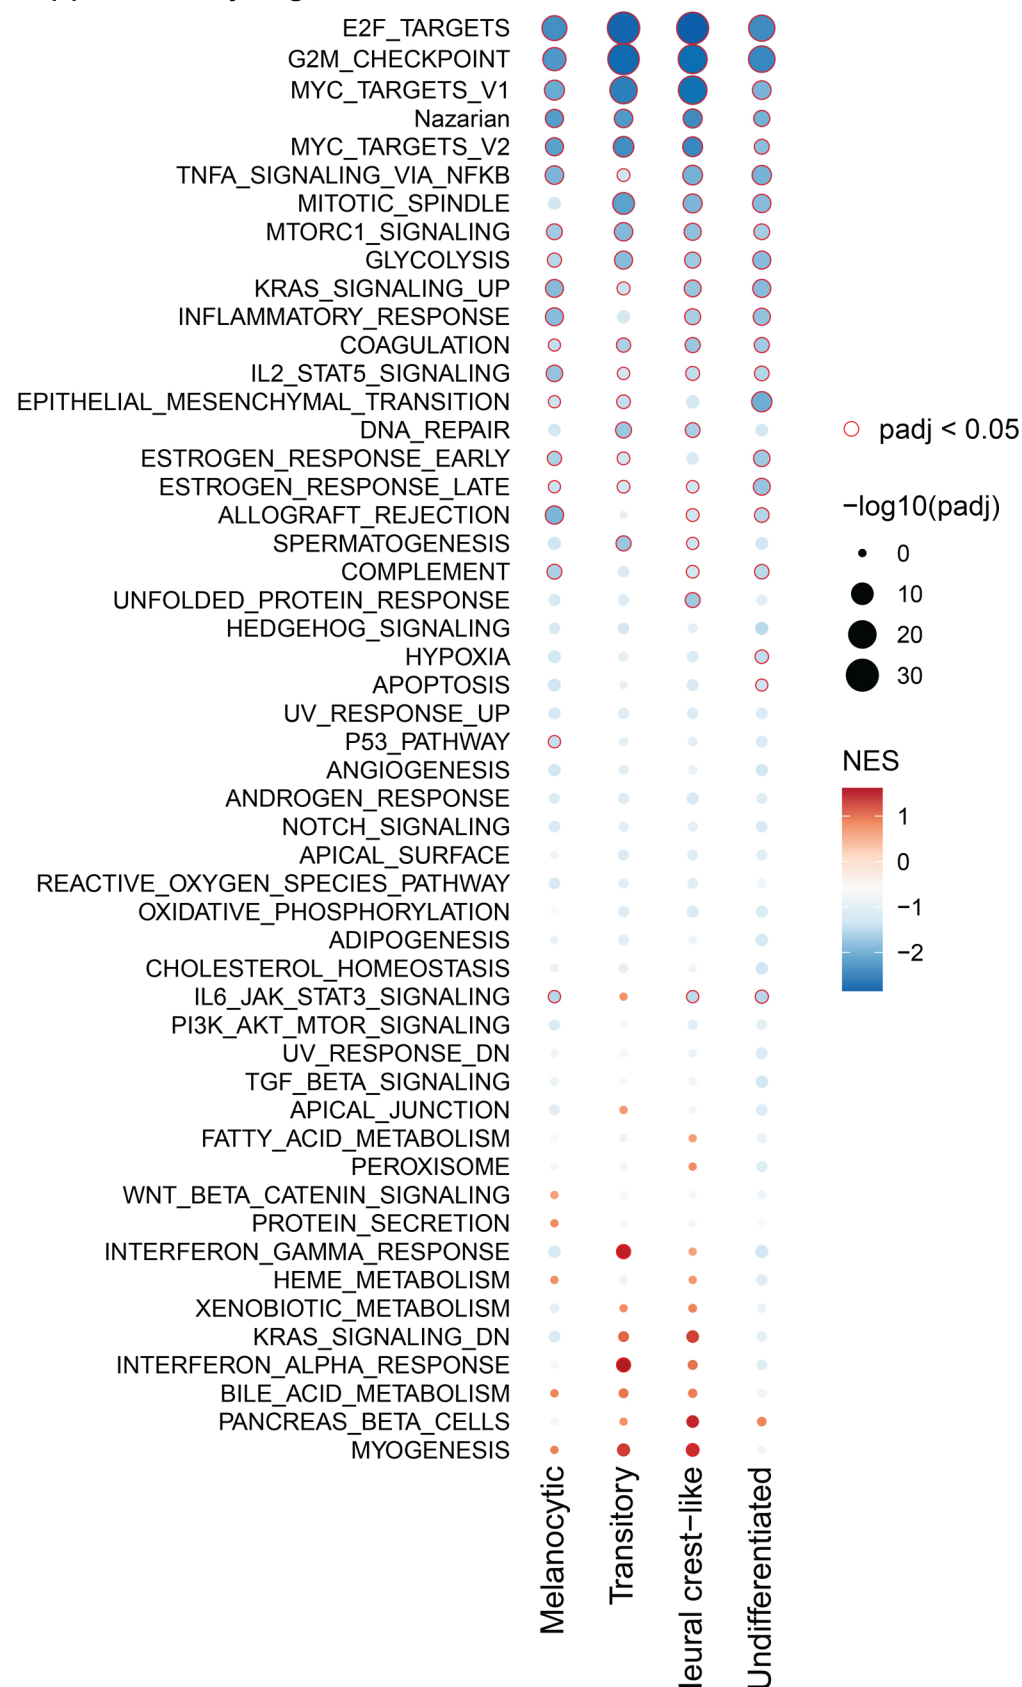

Supplementary Figure 11

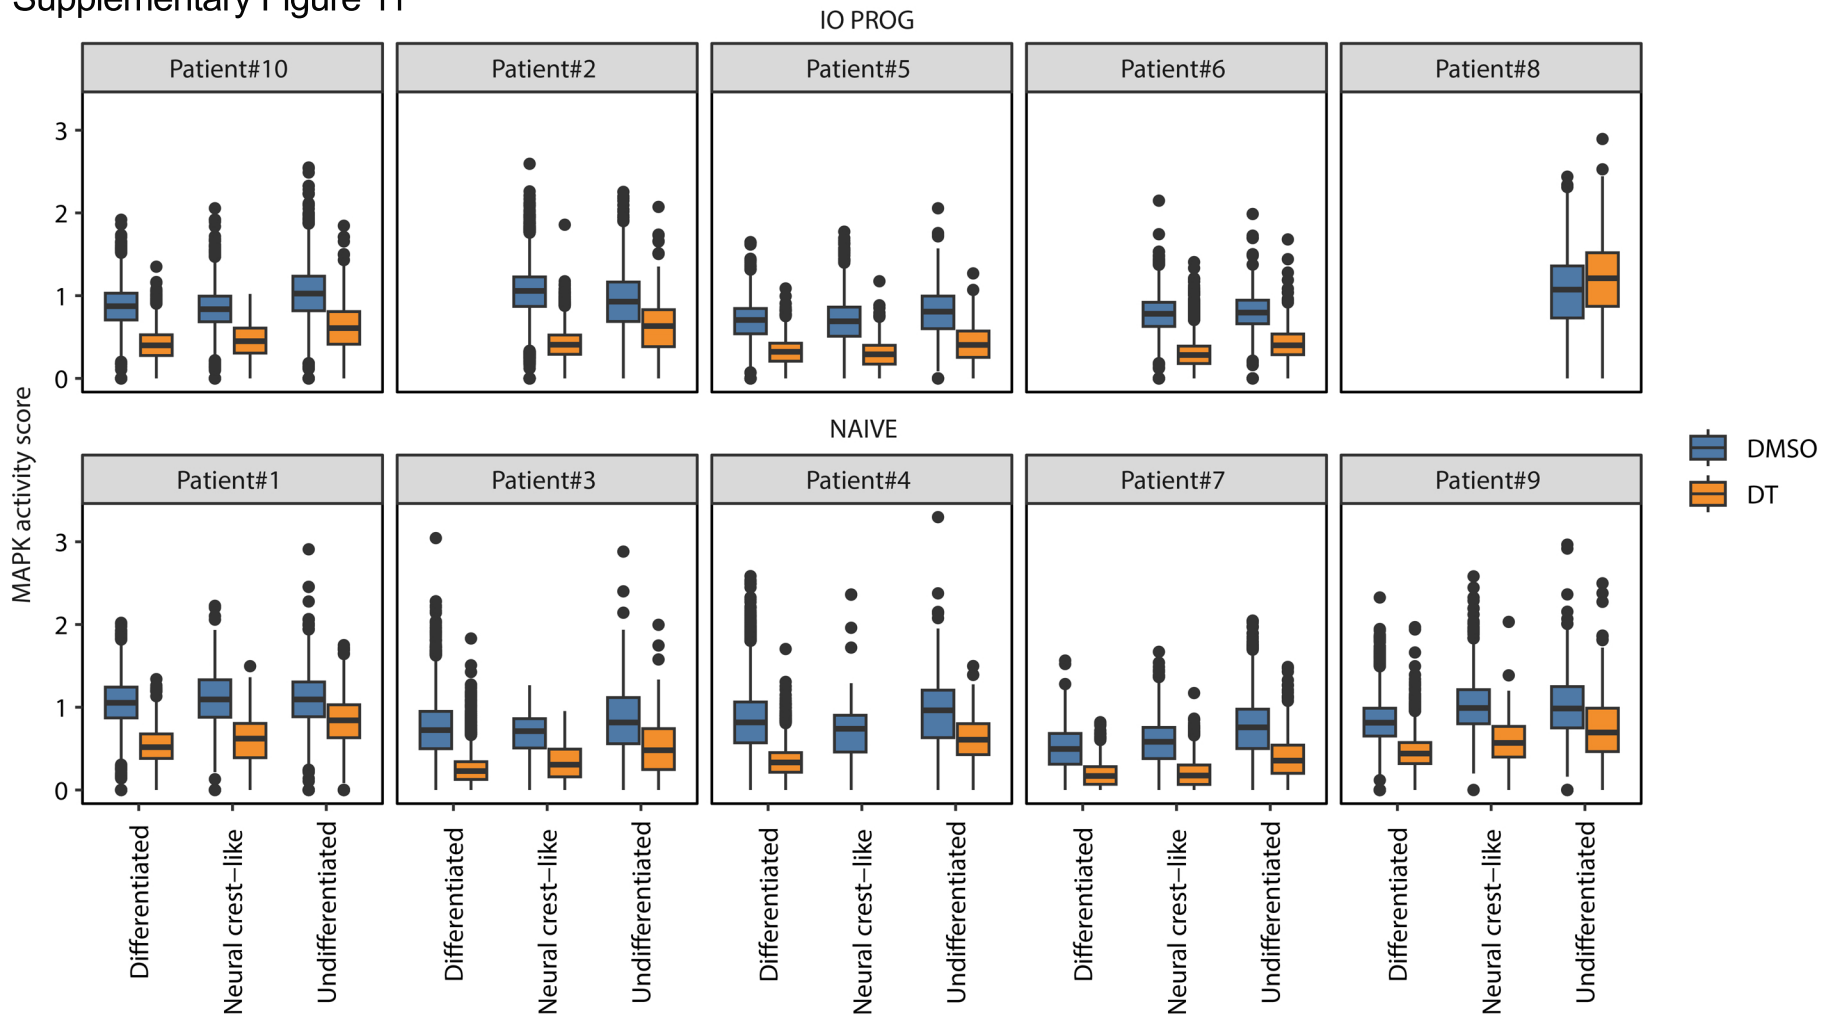

a

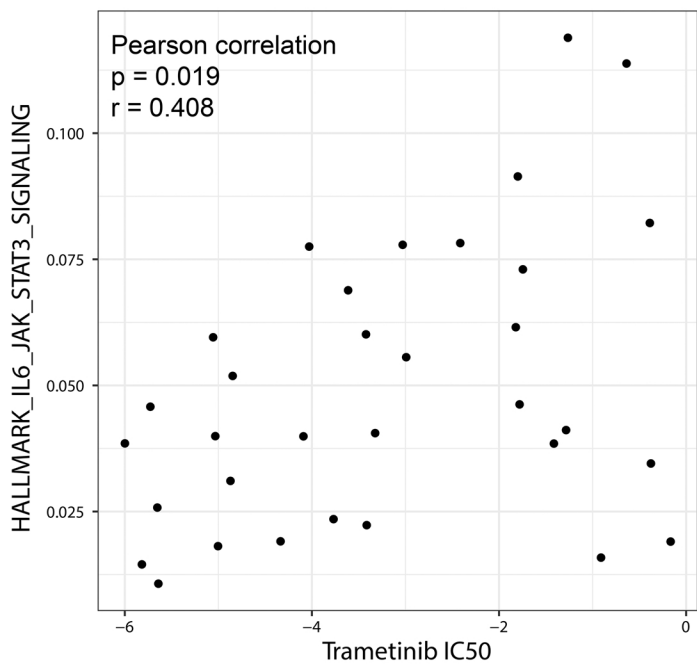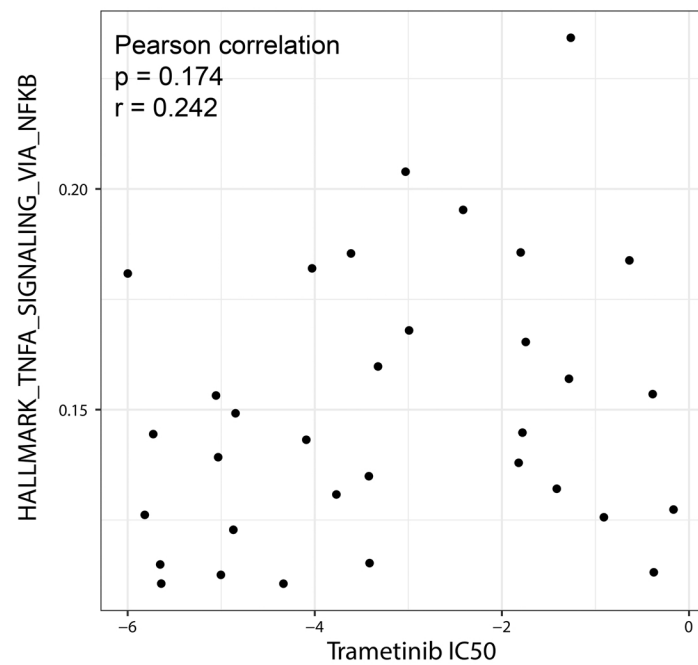

b

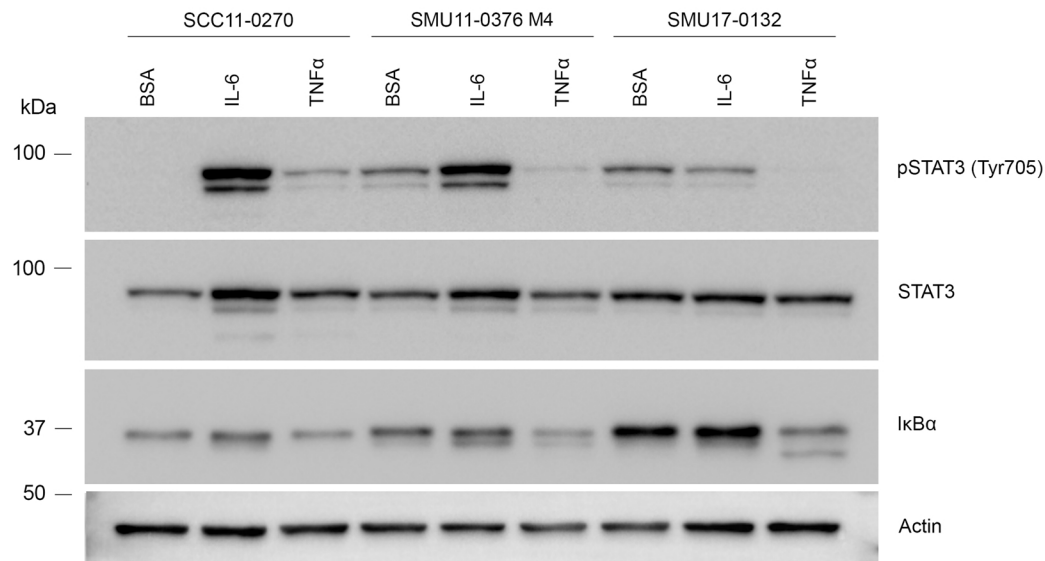

### General gating strategy

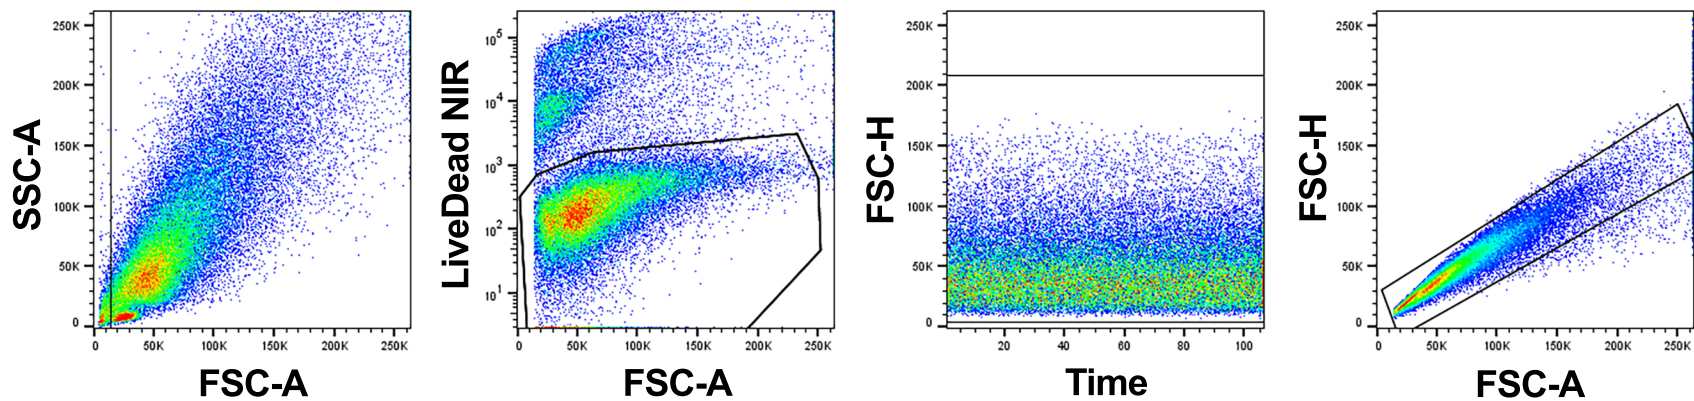

### Melanoma cell gating strategy

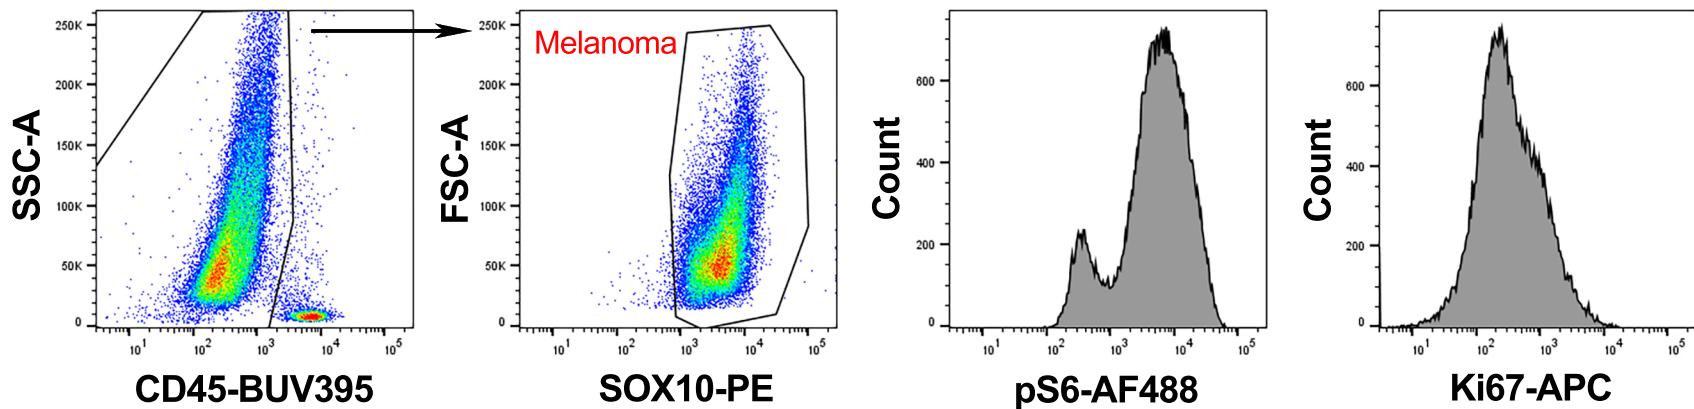

### Immune cell gating strategy

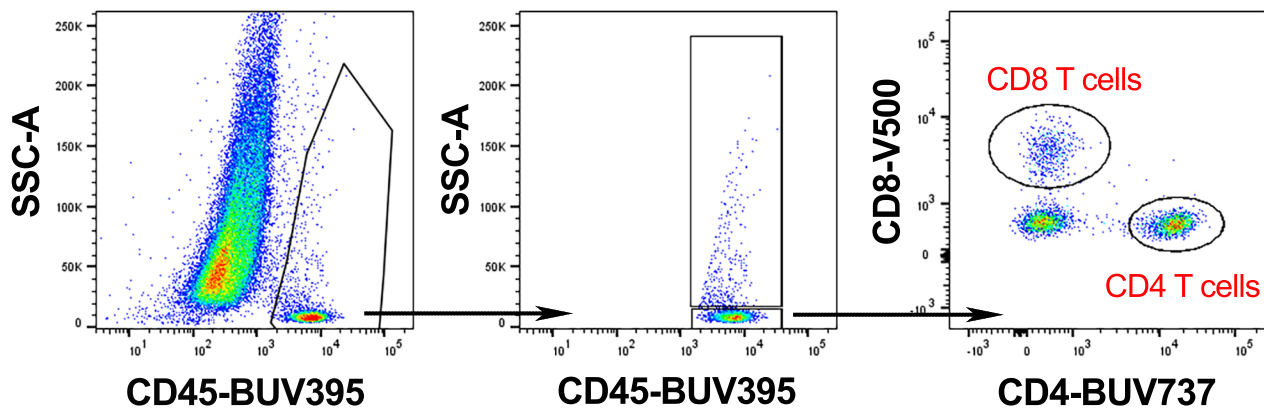

Supplement: mmc2.pdf [file mmc2.pdf]
